# Supplementary material for: Identification of a New Family of Prenylated Volatile Sulfur Compounds in Cannabis Revealed by Comprehensive Two-Dimensional Gas Chromatography
Source: PubMed Central journal article supplement — ACS Omega. 2021 Nov 12;6(47):31667–76. doi: 10.1021/acsomega.1c04196 (PMC8638000; doi:10.1021/acsomega.1c04196), 2021-11-12
Supplement: ao1c04196_si_001.pdf [file ao1c04196_si_001.pdf]

# Supporting Information

## Identification of New Family of Prenylated Volatile Sulfur Compounds in *Cannabis* Revealed by Comprehensive Two-Dimensional Gas Chromatography

Iain W. H. Oswald<sup>1\*</sup>, Marcos A. Ojeda<sup>1</sup>, Ryan J. Pobanz<sup>1</sup>, Kevin A. Koby<sup>1</sup>, Anthony J. Buchanan<sup>2</sup>, Josh Del Rosso<sup>3</sup>, Mario A. Guzman<sup>4</sup>, Thomas J. Martin<sup>1</sup>

<sup>1</sup>*Department of Research and Development, Abstrax Tech, 2661 Dow Avenue, Tustin, CA 92618, United States*

<sup>2</sup>*SepSolve Analytical Ltd., 4 Swan Court, Forder Way, Peterborough, Cambridgeshire, PE7 8GX, United Kingdom*

<sup>3</sup>*Josh D, 325 18<sup>th</sup> Street, Huntington Beach, CA 92648, United States*

<sup>4</sup>*Elysian Group Inc., 1650 Westwood Blvd. suite #200, Los Angeles, CA 90024, United States*

\*correspondence to: [iain.oswald@abstraxtech.com](mailto:iain.oswald@abstraxtech.com)

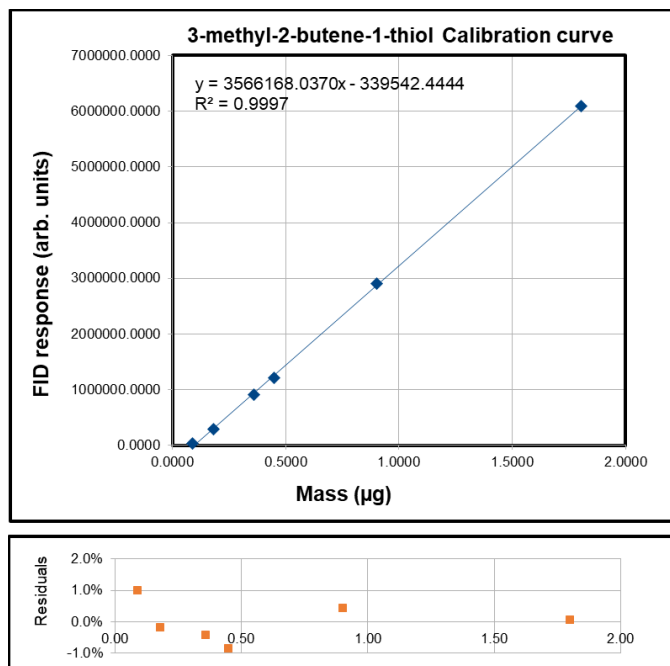

Figure S1. Calibration curve obtained for 3-methyl-2-butene-1-thiol (VSC3).

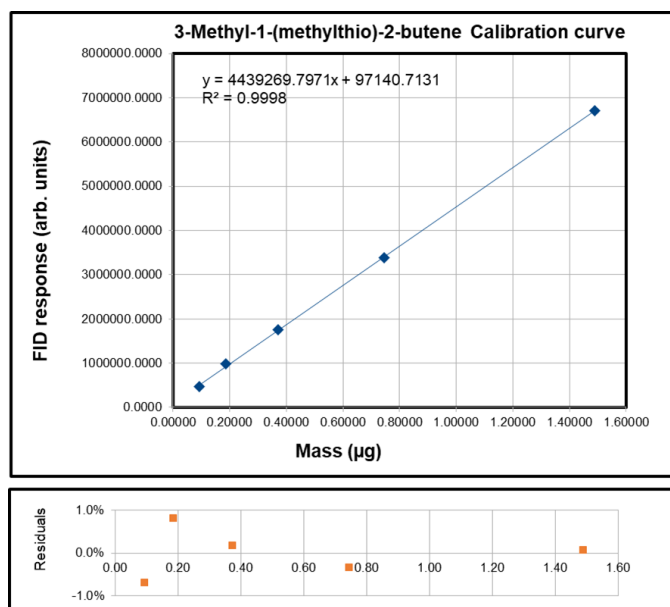

Figure S2. Calibration curve obtained for 3-Methyl-1-(methylthio)-2-butene (VSC4).

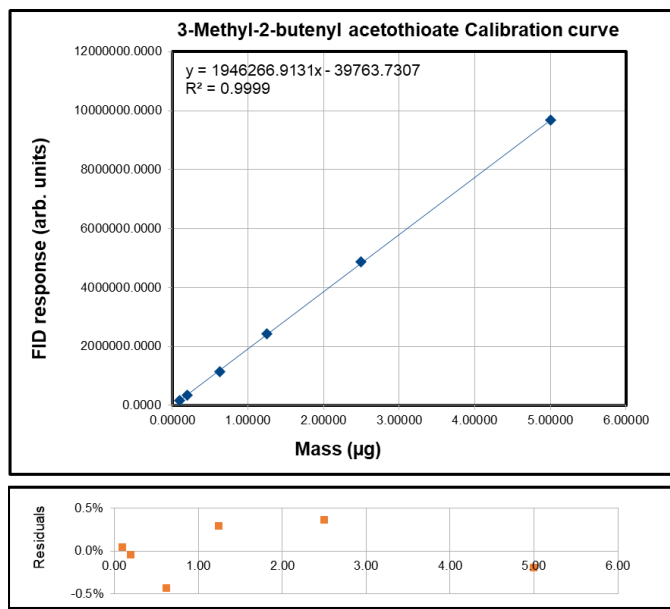

Figure S3. Calibration curve obtained for 3-Methyl-2-butenyl acetothioate (VSC5).

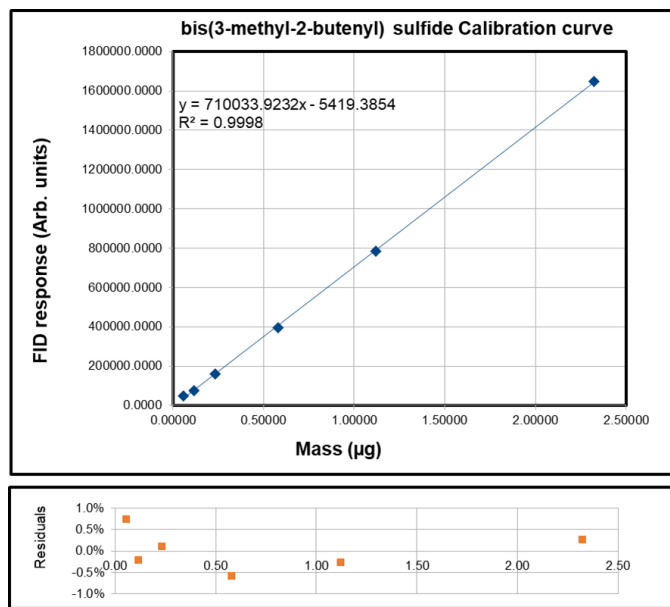

Figure S4. Calibration curve obtained for bis(3-methyl-2-butenyl) sulfide (VSC6).

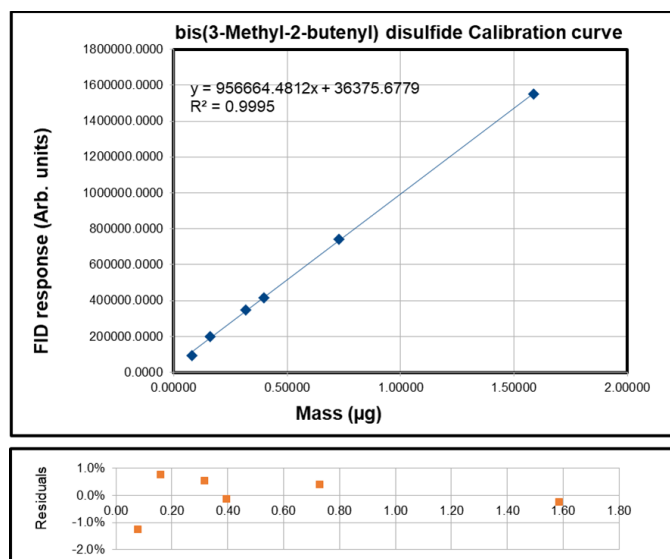

**Figure S5.** Calibration curve obtained for bis(3-Methyl-2-butenyl) disulfide (VSC7).

**Table S1.** Calibration curve data for VSC standards.

| Compound name                     | slope       | intercept   | $R^2$  | LOD*   | LOQ*   |
|-----------------------------------|-------------|-------------|--------|--------|--------|
| 3-methyl-2-butene-1-thiol         | 3566168.037 | -339542.444 | 0.9997 | 0.0413 | 0.1250 |
| 3-Methyl-1-(methylthio)-2-butene  | 4439269.797 | 97140.713   | 0.9998 | 0.0327 | 0.0991 |
| 3-Methyl-2-butenyl acetothioate   | 1946266.913 | -39763.730  | 0.9999 | 0.0551 | 0.1669 |
| bis(3-methyl-2-butenyl) sulfide   | 710033.923  | -5419.385   | 0.9998 | 0.0254 | 0.0769 |
| bis(3-Methyl-2-butenyl) disulfide | 956664.481  | 36375.677   | 0.9995 | 0.0437 | 0.0133 |

\*LOD and LOQ are defined by the equations:  $LOD = 3.3 \cdot \frac{\sigma}{S}$ ;  $LOQ = 10 \cdot \frac{\sigma}{S}$  where  $\sigma$  is the standard deviation of the y-intercept and  $S$  is the slope of the curve.

**Table S2.** Calibration curve data of cannabis terpene standard used to quantify major aroma compounds in cultivars.

| Compound name       | slope    | intercept | $R^2$    | LOD*  | LOQ*  | STD       |
|---------------------|----------|-----------|----------|-------|-------|-----------|
| (+)-Cedrol          | 950929.1 | -10838    | 0.999107 | 0.024 | 0.074 | 7017.150  |
| (-)-Isopulegol      | 2490659  | -80494    | 0.999481 | 0.019 | 0.056 | 14010.908 |
| 3-Carene            | 1815333  | 10688     | 0.999799 | 0.012 | 0.035 | 6354.137  |
| Camphene            | 5035385  | 5230      | 0.999954 | 0.006 | 0.017 | 8430.713  |
| Camphor             | 3202872  | -27610    | 0.999831 | 0.011 | 0.032 | 10271.194 |
| Caryophyllene       | 2393393  | 11151     | 0.999738 | 0.013 | 0.040 | 9566.680  |
| Caryophyllene oxide | 684208.4 | -24100    | 0.99072  | 0.079 | 0.239 | 16346.295 |
| Fenchone            | 3697566  | -85718    | 0.99169  | 0.075 | 0.226 | 83553.655 |
| Geranyl acetate     | 1050417  | -41580    | 0.994326 | 0.062 | 0.186 | 19587.701 |
| Isoborneol          | 2958475  | -58697    | 0.991953 | 0.073 | 0.222 | 65776.919 |
| Linalool            | 2945207  | -43159    | 0.999952 | 0.006 | 0.017 | 5051.017  |
| Menthol             | 2300718  | -25902    | 0.99834  | 0.033 | 0.101 | 23159.093 |
| Nerol**             | 631185.8 | -9784     | 0.925232 | 0.232 | 0.702 | 44292.747 |
| Valencene           | 2051537  | -25307    | 0.999939 | 0.006 | 0.019 | 3942.882  |
| cis-Nerolidol       | 863783.1 | -25351    | 0.999673 | 0.015 | 0.045 | 3858.102  |
| $\alpha$ -Bisabolol | 460421.2 | -6677     | 0.996178 | 0.050 | 0.153 | 7040.231  |

|                        |          |         |          |          |          |           |
|------------------------|----------|---------|----------|----------|----------|-----------|
| $\alpha$ -Phellandrene | 6299806  | -61298  | 0.999916 | 0.007    | 0.023    | 14238.957 |
| $\beta$ -Myrcene       | 3983419  | 16289   | 0.999963 | 0.005    | 0.015    | 6022.747  |
| $\beta$ -Ocimene       | 3247385  | -57569  | 0.999826 | 0.011    | 0.033    | 10567.730 |
| (+)-Pulegone**         | 512474.7 | -18102  | 0.973636 | 0.246464 | 0.746861 | 22000     |
| Camphor                | 6878673  | -162308 | 0.995964 | 0.095347 | 0.28893  | 284000    |
| Geraniol               | 2503981  | -150385 | 0.987835 | 0.166209 | 0.503664 | 58437     |
| Guaiol**               | 717502.1 | 11145   | 0.935813 | 0.392262 | 1.188672 | 28907     |
| Humulene               | 2857654  | -90132  | 0.991378 | 0.139682 | 0.423278 | 121000    |
| Limonene               | 5194645  | -74418  | 0.995282 | 0.103122 | 0.312492 | 267000    |
| Sabinene               | 3792703  | -97700  | 0.996617 | 0.087259 | 0.26442  | 143000    |
| Terpinolene            | 4514111  | -137420 | 0.992288 | 0.132045 | 0.400137 | 176000    |
| endo-Borneol           | 5176182  | -137987 | 0.999568 | 0.031155 | 0.094409 | 164000    |
| endo-Fenchol           | 3081473  | -47145  | 0.998957 | 0.048408 | 0.146692 | 124000    |
| trans-Nerolidol        | 641674.3 | -14424  | 0.986496 | 0.175242 | 0.531036 | 18036     |
| trans-Sabinene hydrate | 1792484  | -56566  | 0.996241 | 0.092004 | 0.2788   | 57265     |
| $\alpha$ -Pinene       | 5038302  | -10371  | 0.997008 | 0.082054 | 0.248647 | 294000    |
| $\alpha$ -Terpinene    | 4634677  | -121630 | 0.995327 | 0.102627 | 0.31099  | 183000    |
| $\alpha$ -Terpineol    | 1746898  | -50997  | 0.99532  | 0.102709 | 0.31124  | 45772     |
| $\beta$ -Pinene        | 5857299  | -82800  | 0.996525 | 0.088445 | 0.268015 | 285000    |
| $\gamma$ -Terpinene    | 5302039  | -126354 | 0.995006 | 0.106109 | 0.321541 | 227000    |

\*LOD and LOQ are defined by the equations:  $LOD = 3.3 \cdot \frac{\sigma}{S}$ ;  $LOQ = 10 \cdot \frac{\sigma}{S}$  where  $\sigma$  is the standard deviation of the  $y$ -intercept and  $S$  is the slope of the curve. \*\*Analytes with  $R^2$  less than 0.98 were excluded from analysis.

**Table S3.** Unidentified Volatile sulfur compounds (VSCs) detected in certain cultivars and their respective retention times.

| Compound ID | Samples detected in       | $^1t_R, ^2t_R$ (min, s) |
|-------------|---------------------------|-------------------------|
| U1          | All samples               | 4.079, 1.768            |
| U2          | C1, C2, C3                | 9.009, 1.985            |
| U3          | C1 – C7                   | 25.441, 2.851           |
| U4          | C7, Acai Berry Gelato BHO | 17.409, 4.045           |
| U5          | C7                        | 23.291, 3.881           |

**Table S4.** Cultivars, cultivators, sample ages, individual olfactory scores, and average olfactory scores.

| Sample ID | Cultivar              | Cultivator             | Sample Age (days) <sup>2</sup> | Score 1 | Score 2 | Score 3 | Score 4 | Olfactory score |
|-----------|-----------------------|------------------------|--------------------------------|---------|---------|---------|---------|-----------------|
| C1        | Bacio Gelato          | Sherbinskis            | 13                             | 10      | 10      | 10      | 10      | 10.0(0)         |
| C2        | Clone Guy OG          | This work <sup>1</sup> | 1                              | 9       | 8.5     | 8.2     | 8.8     | 8.6(4)          |
| C3        | Gelato <sup>3</sup>   | Clone Guy              | 4                              | 8       | 7.5     | 8.5     | 7.6     | 7.9(5)          |
| C4        | Area 41               | Alien Labs             | 24                             | 7.7     | 8.5     | 8.2     | 8       | 8.1(3)          |
| C5        | Jetlag OG             | Andretti               | 28                             | 8       | 7.5     | 7.5     | 7       | 7.5(4)          |
| C6        | Gushers               | Connected              | 109                            | 6       | 7.5     | 7.4     | 7       | 7.0(7)          |
| C7        | WiFi Cake             | Jungle Boys            | 15                             | 6       | 6.5     | 7       | 6.6     | 6.5(4)          |
| C8        | Apple Fritter         | Fresh Baked            | 41                             | 6       | 5       | 4.5     | 5.5     | 5.3(6)          |
| C9        | Chem 91               | Jungle Boys            | 50                             | 1.5     | 2       | 2       | 1       | 1.6(5)          |
| C10       | Gelato <sup>3</sup>   | Clone Guy              | 46                             | 2.5     | 4       | 2       | 2       | 2.6(9)          |
| C11       | Cali Berry            | Lumpy's                | 35                             | 1       | 1       | 1.5     | 1       | 1.1(3)          |
| C12       | Gouda Berry           | Exotic Genetix         | 46                             | 0       | 0       | 0       | 0       | 0.0(0)          |
| C13       | Black Jack            | Hyperwolf              | 10                             | 0       | 0       | 0       | 0       | 0.0(0)          |
| -         | Bacio Gelato BHO      | Sherbinskis            | -                              | 9.5     | 9.8     | 10      | 9.8     | 9.8(2)          |
| -         | Gello Gelato BHO      | Sherbinskis            | -                              | 9.4     | 9.8     | 9.7     | 9.8     | 9.7(2)          |
| -         | Acai Berry Gelato BHO | Sherbinskis            | -                              | 9.4     | 9.7     | 9.9     | 9.5     | 9.6(2)          |

<sup>1</sup>Clone Guy OG data was obtained from samples from indoor greenhouse trial. <sup>2</sup>Sample age is defined as the time between packaging date and data collection date. <sup>3</sup>C3 and C10 were same product lot measured at different sample ages.

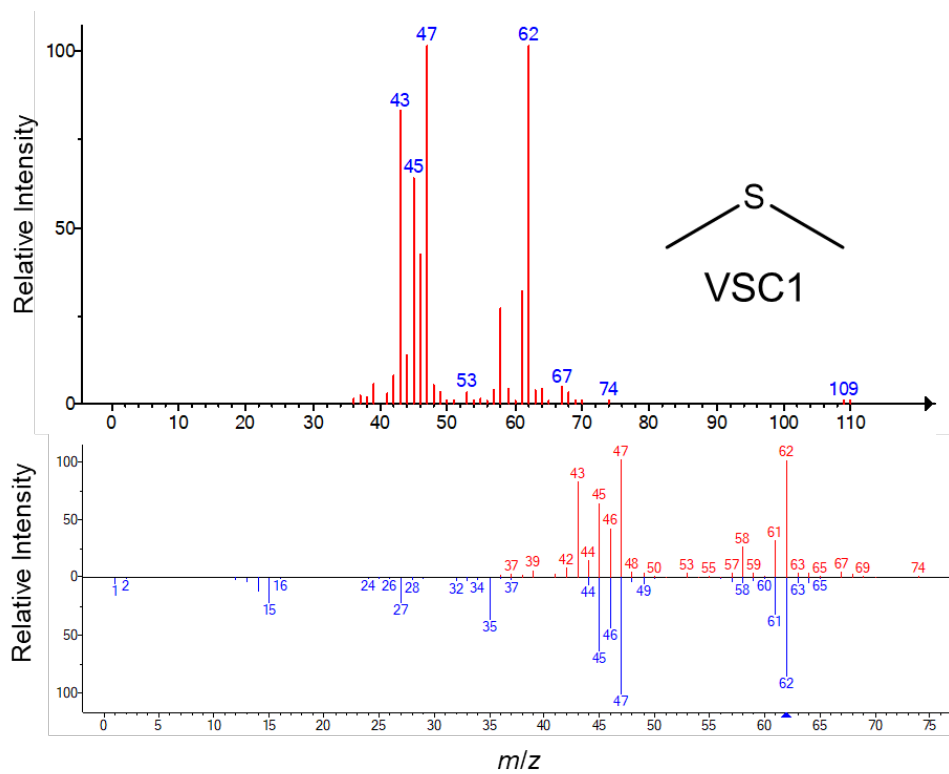

**Figure S6.** Top: Mass spectrum of **VSC1** in **C1**. Bottom: Mass spectrum of **VSC1** compared with Dimethyl disulfide from NIST Spectral Library v17 (2017) (CAS # 75-18-3).

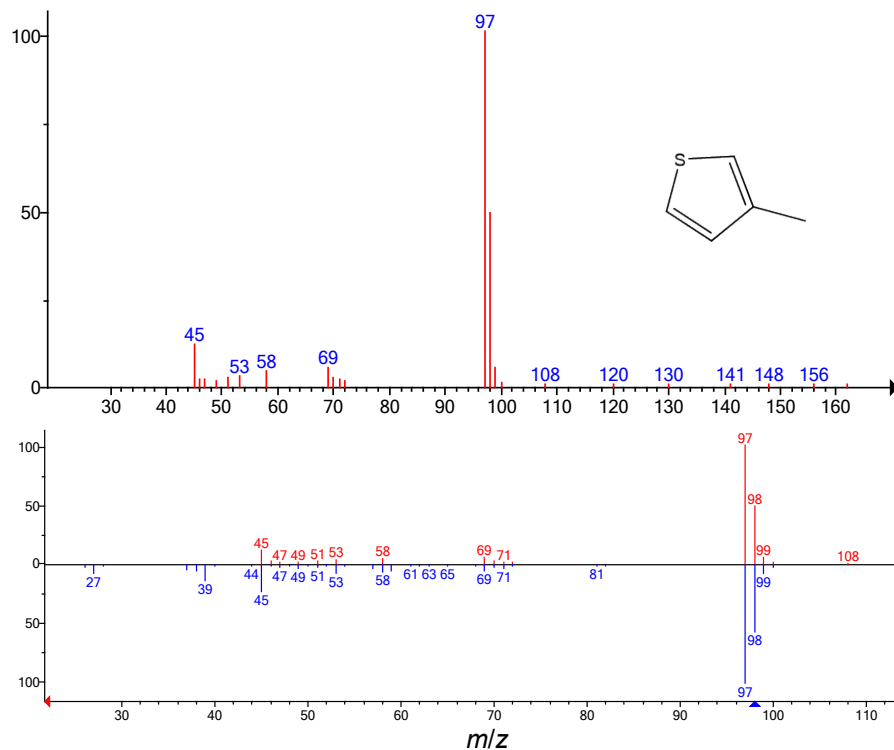

**Figure S7.** Mass spectrum of compound **VSC2** in **C1**. Bottom: Mass spectrum of **VSC2** compared with 3-Methylthiophene from the NIST Spectral Library v17 (2017) (CAS # 616-44-4).



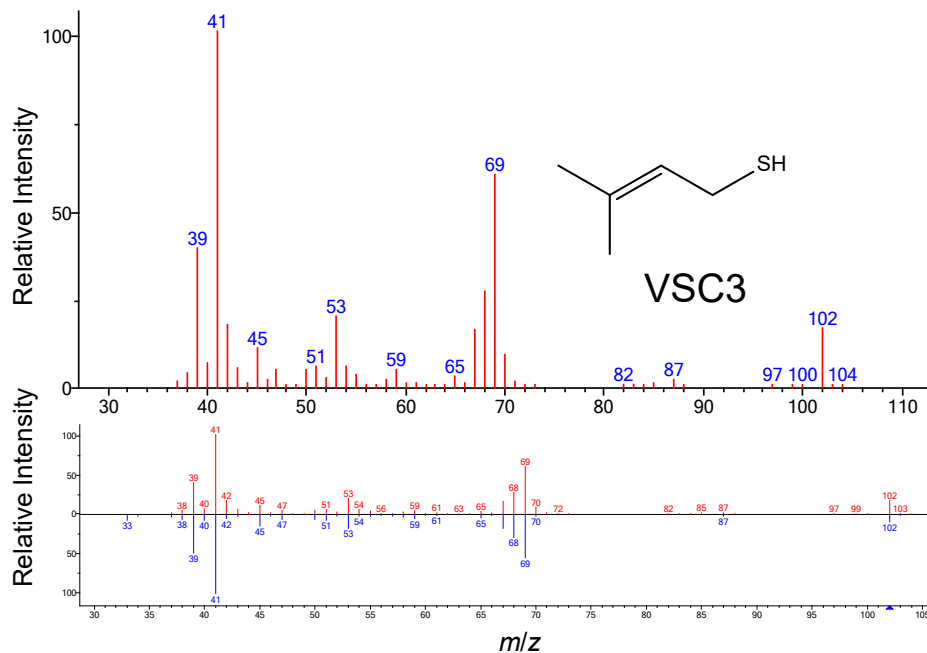

**Figure S8.** Top: Mass spectrum of compound **VSC3** in **C1**. Bottom: Mass spectrum of **VSC3** compared with 3-methylbut-2-ene-1-thiol from the NIST Spectral Library v17 (2017) (CAS # 5287-45-6).

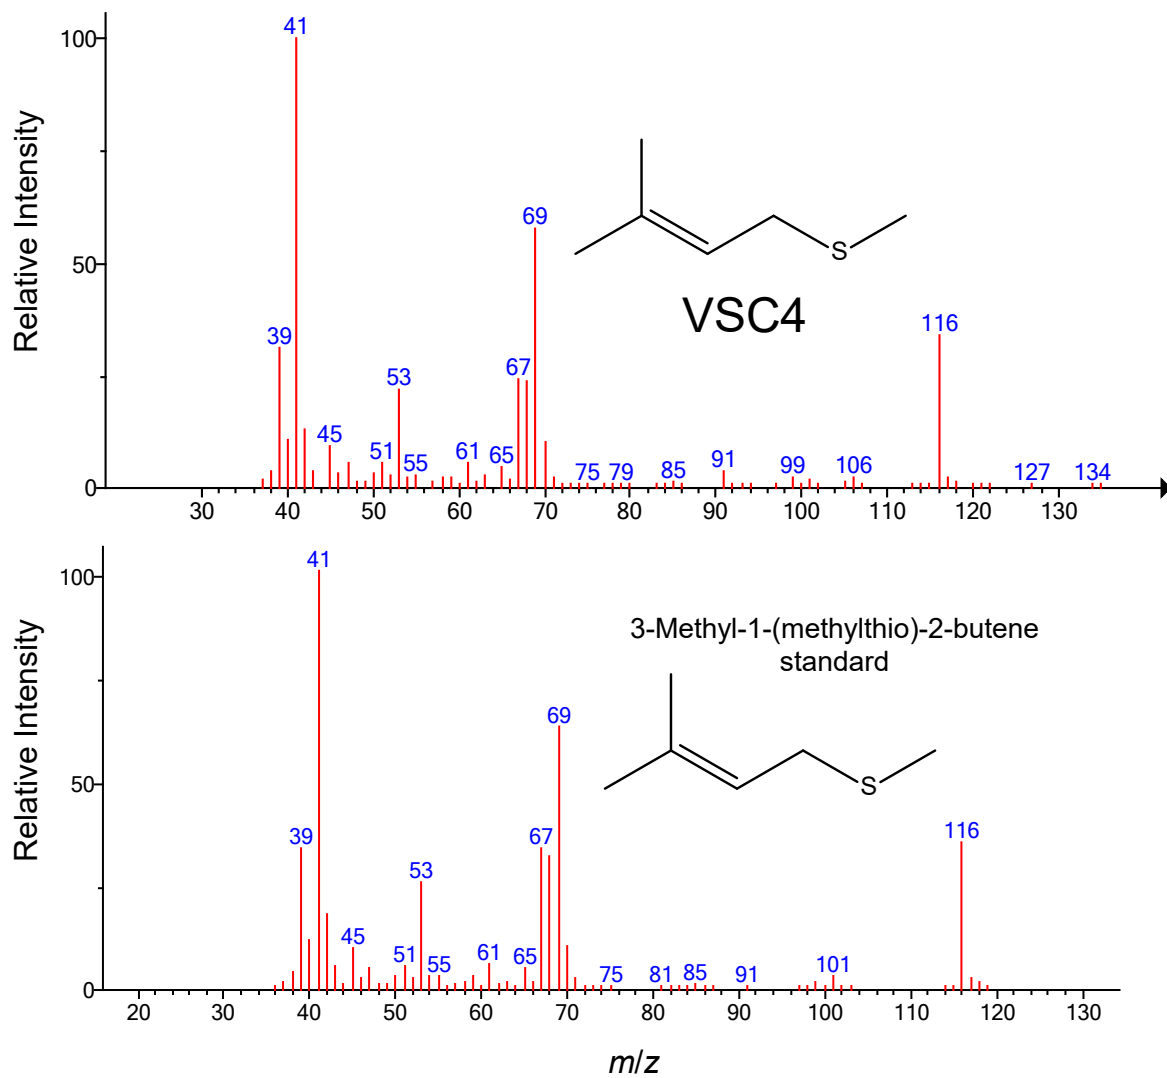

**Figure S9.** Top: Mass spectrum of compound VSC4 in C1. Bottom: Mass spectrum of 3-Methyl-1-(methylthio)-2-butene standard.

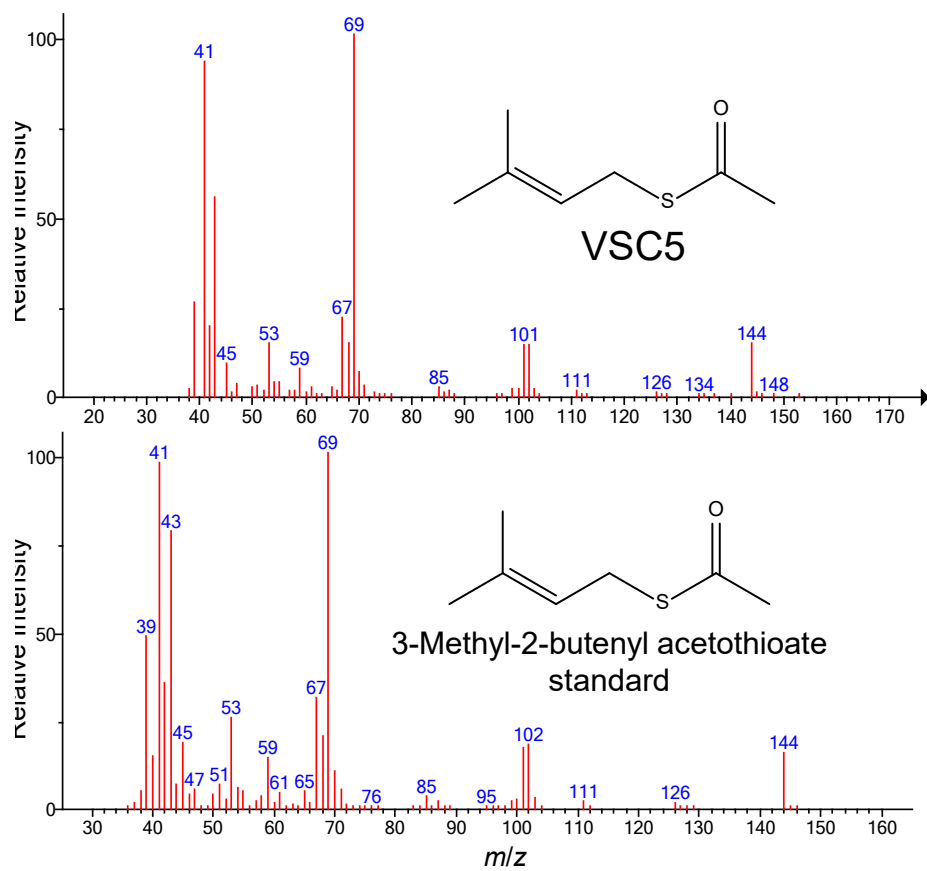

**Figure S10.** Top: Mass spectrum of compound VSC5 in C1. Bottom: Mass spectrum of 3-Methyl-2-butenyl acetothioate standard (CAS # 33049-93-3).

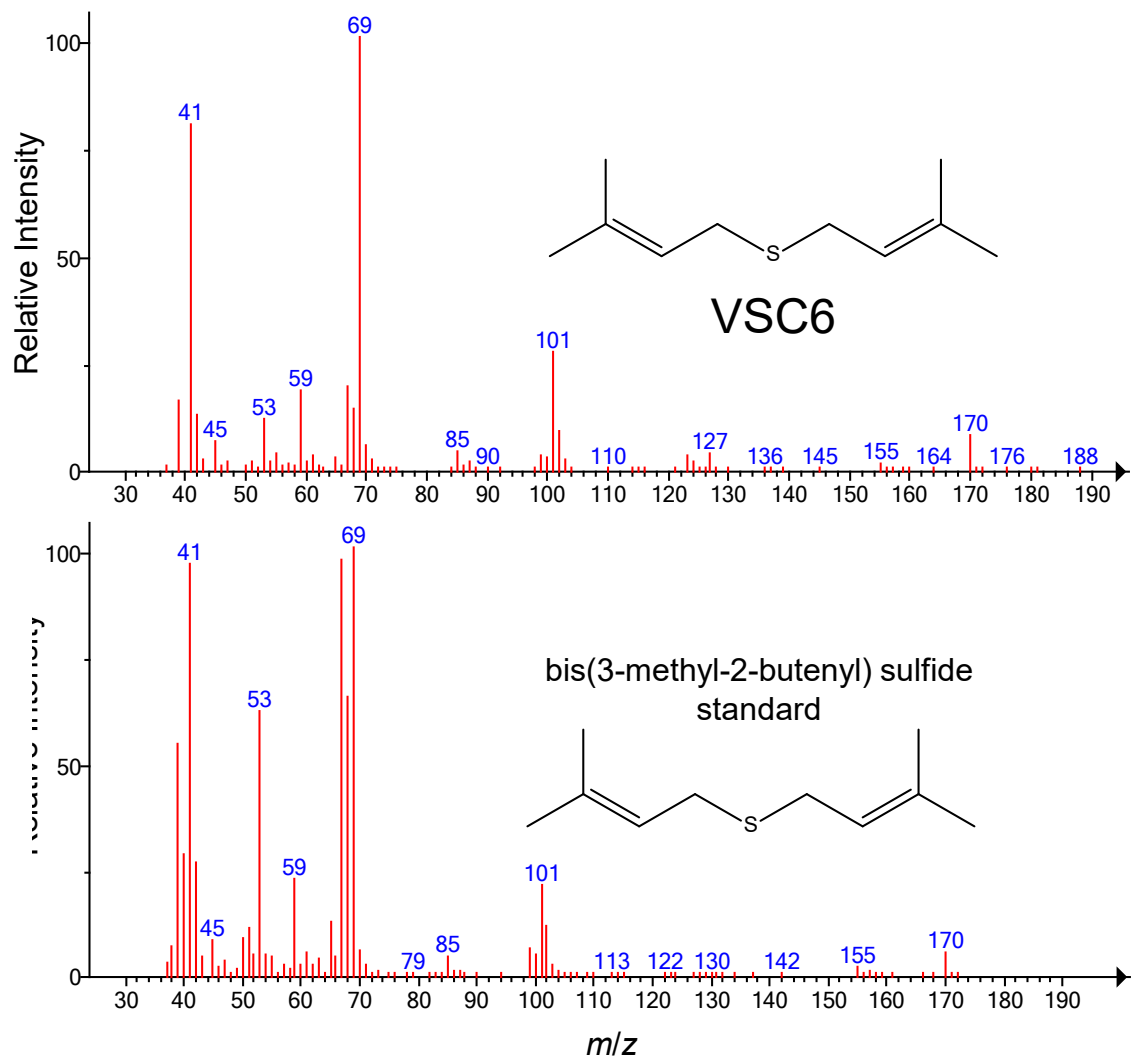

**Figure S11.** Top: Mass spectrum of compound of VSC6 in C1. Bottom: Mass spectrum of bis(3-methyl-2-butenyl) sulfide standard.

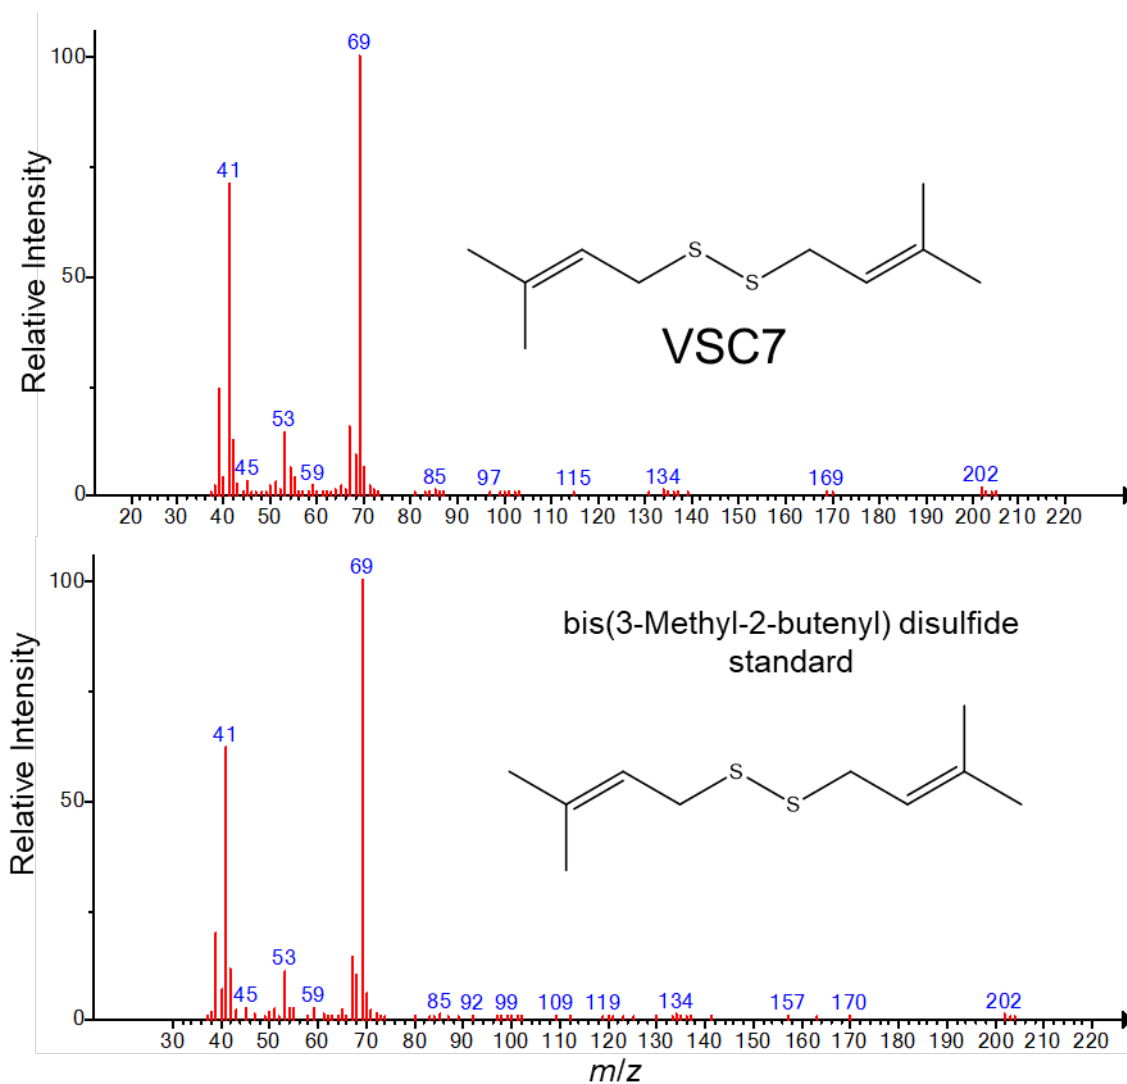

**Figure S12.** Top: Mass spectrum of compound VSC7 in C1. Bottom: Mass spectrum of bis(3-Methyl-2-butenyl) disulfide standard.

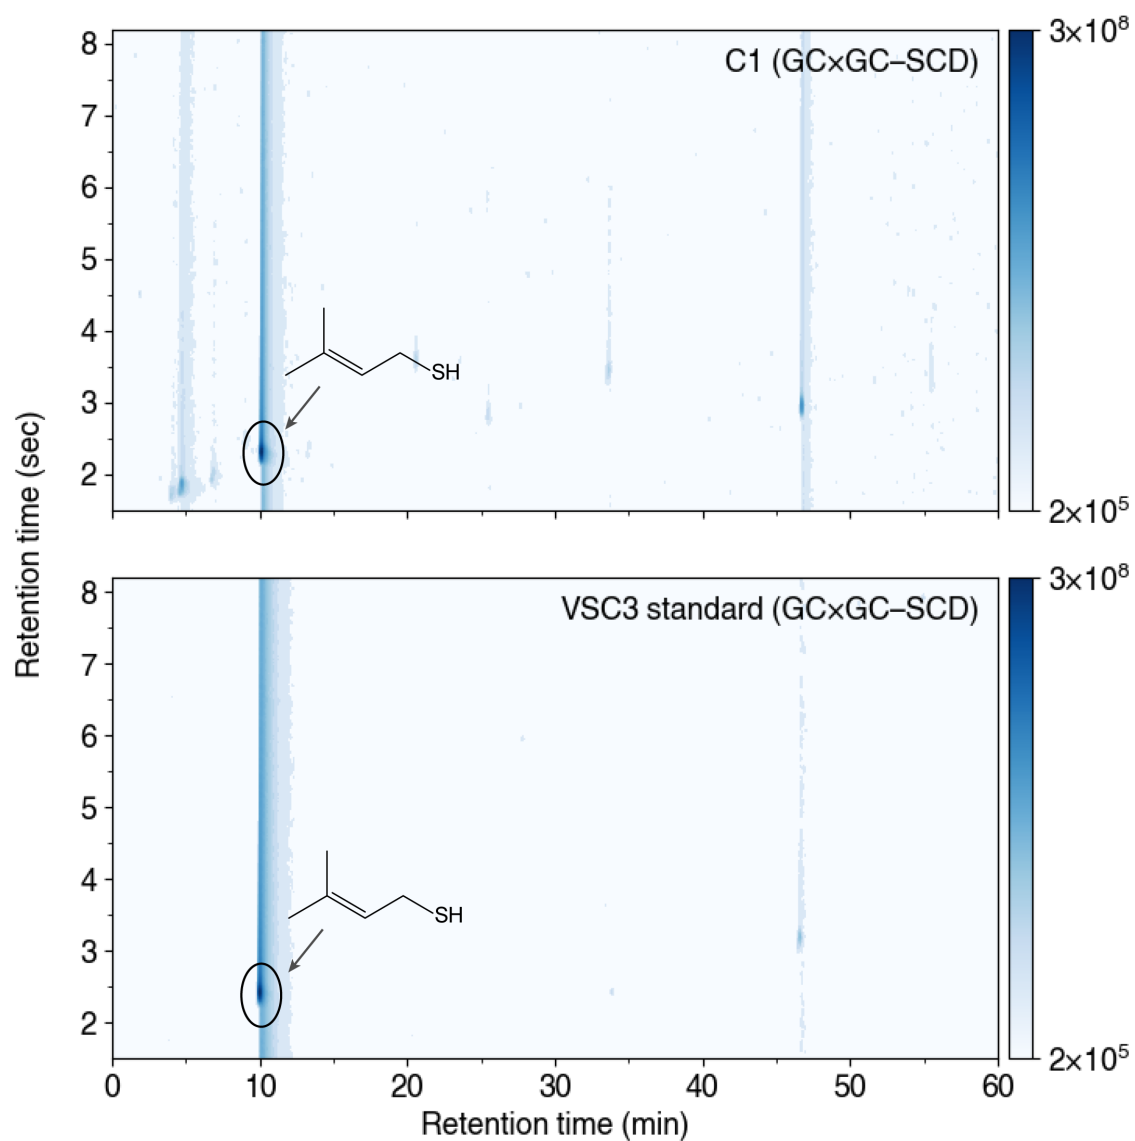

**Figure S13.** GC×GC–SCD 2-Dimensional chromatograms comparing VSC3 elution in Bacio Gelato versus 3-methyl-2-butene-1-thiol (VSC3) standard.

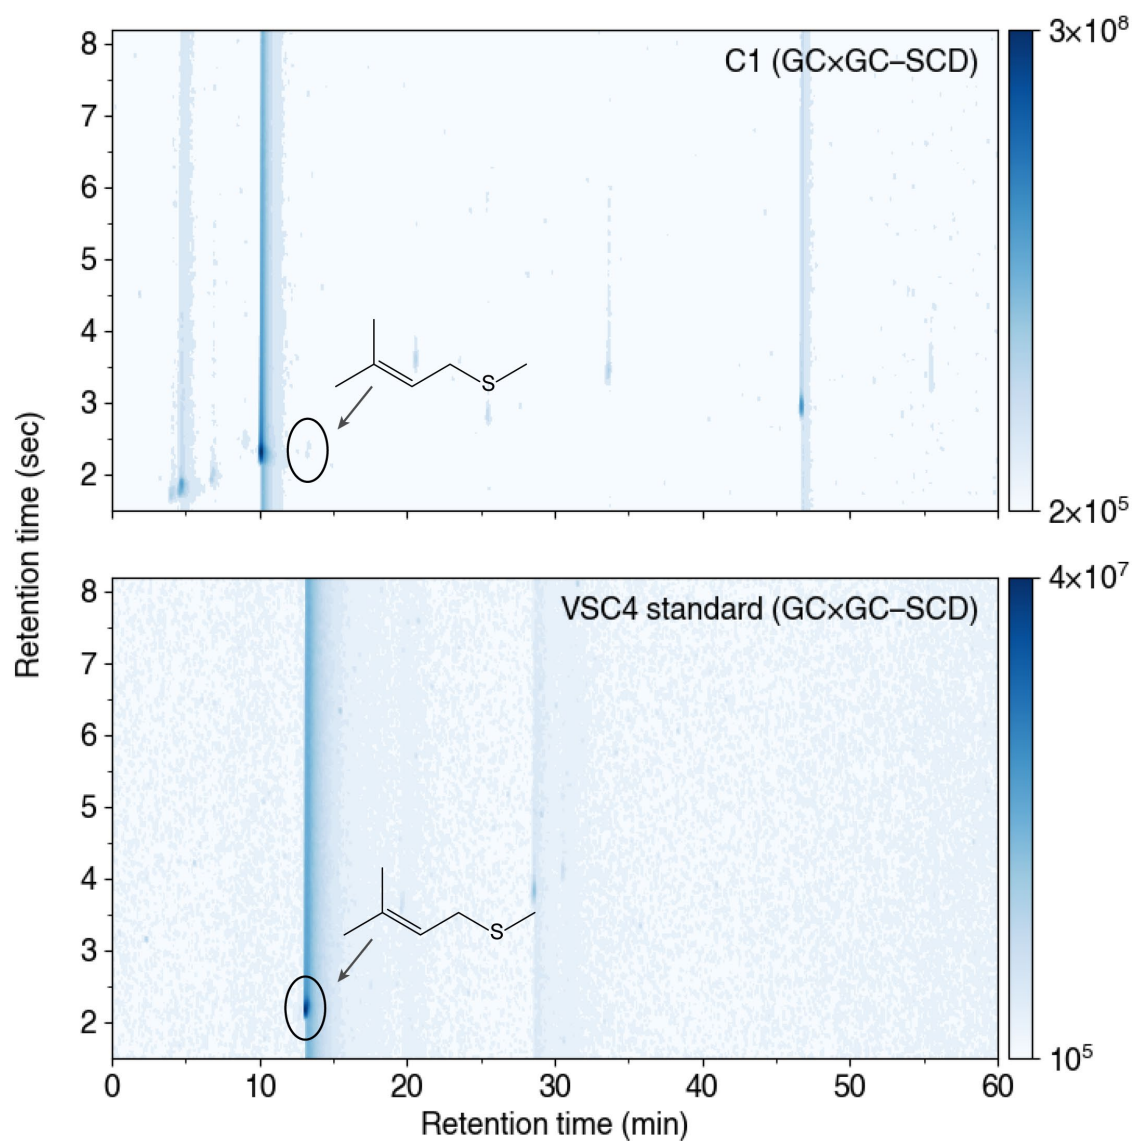

**Figure S14.** GC×GC–SCD 2-Dimensional chromatograms comparing VSC4 elution in Bacio Gelato versus 3-Methyl-1-(methylthio)-2-butene (VSC4) standard.

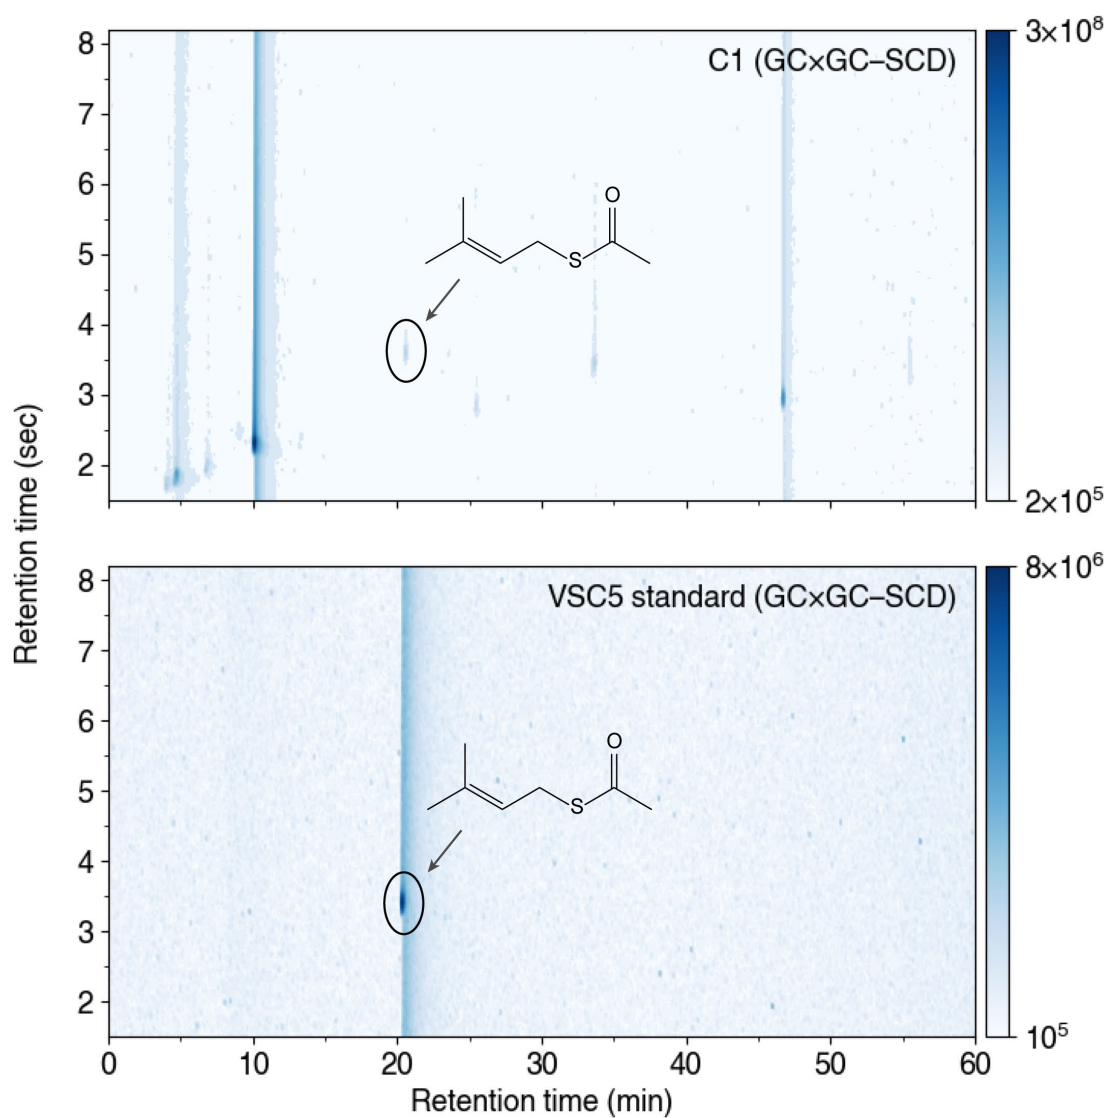

**Figure S15.** GCxGC-SCD 2-Dimensional chromatograms comparing VSC5 elution in Bacio Gelato versus 3-Methyl-2-butenyl acetothioate (VSC5) standard.



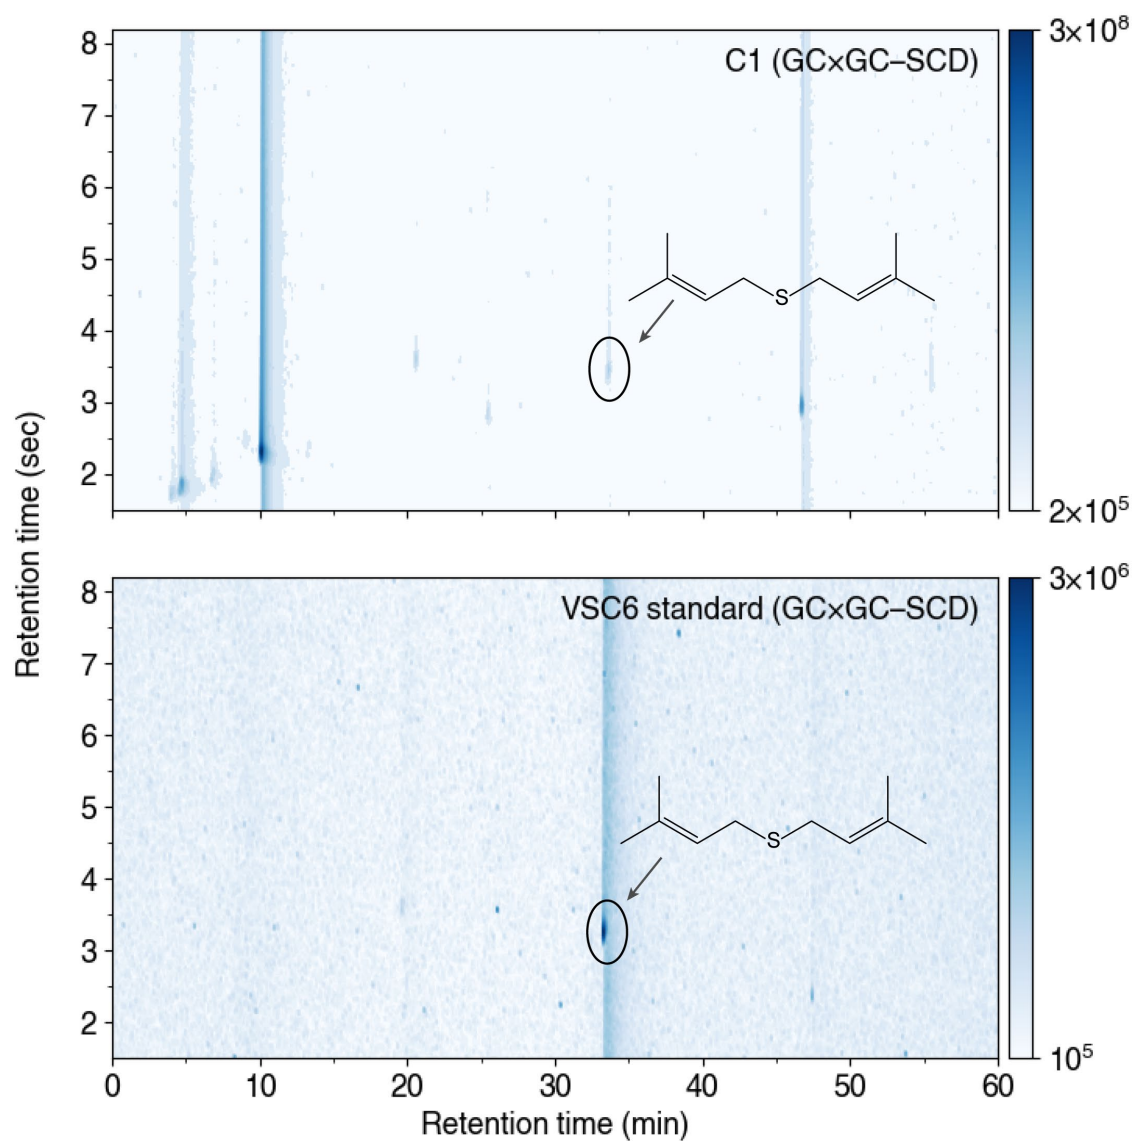

**Figure S16.** GCxGC-SCD 2-Dimensional chromatograms comparing VSC6 elution in Bacio Gelato versus bis(3-methyl-2-butenyl) sulfide (VSC6) standard.

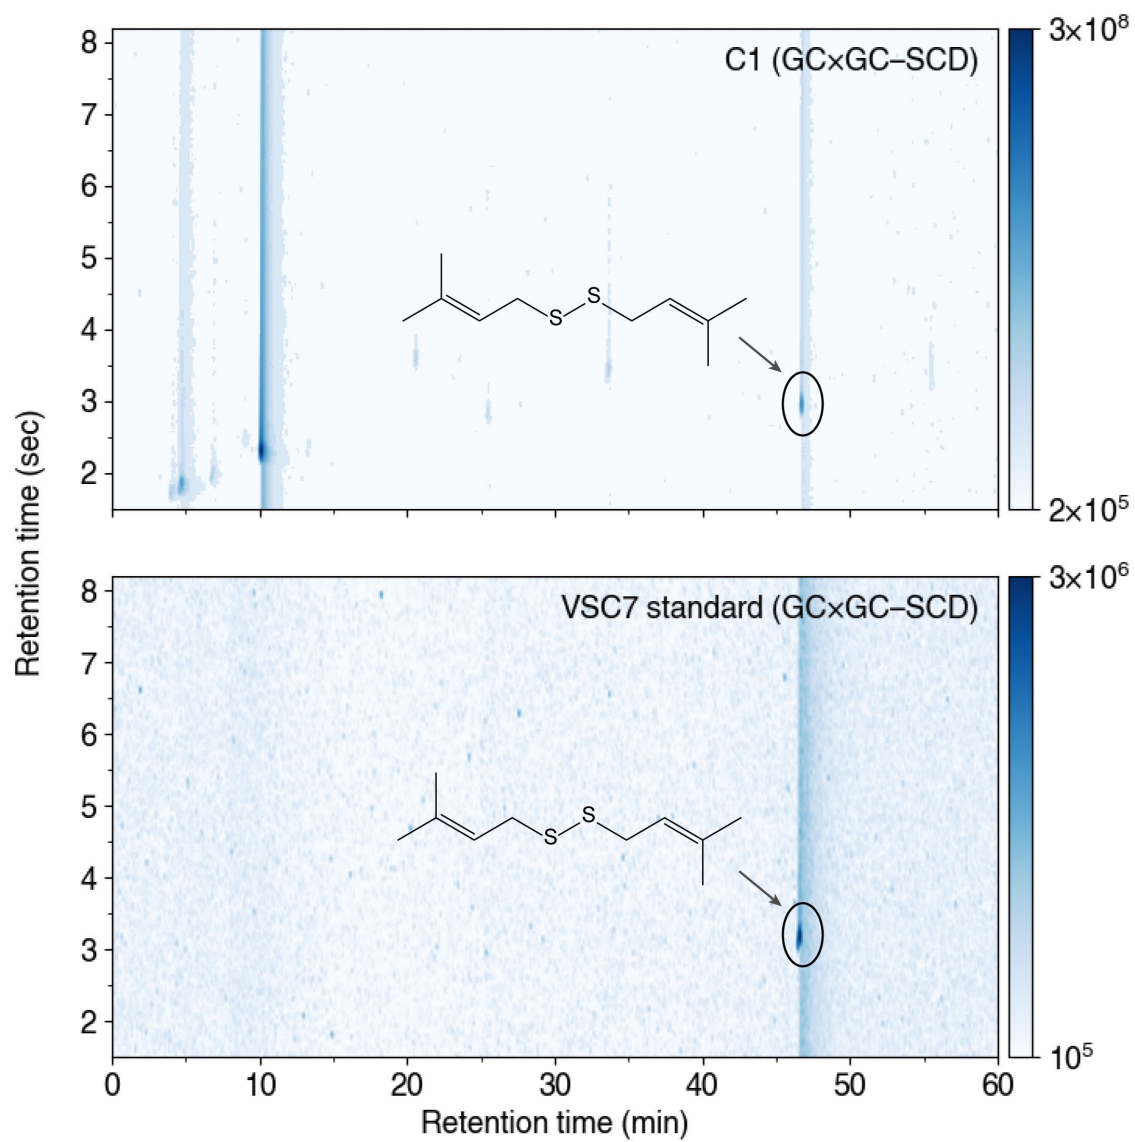

**Figure S17.** GC×GC–SCD 2-Dimensional chromatograms comparing VSC7 elution in Bacio Gelato versus bis(3-methyl-2-butenyl) disulfide (VSC7) standard.

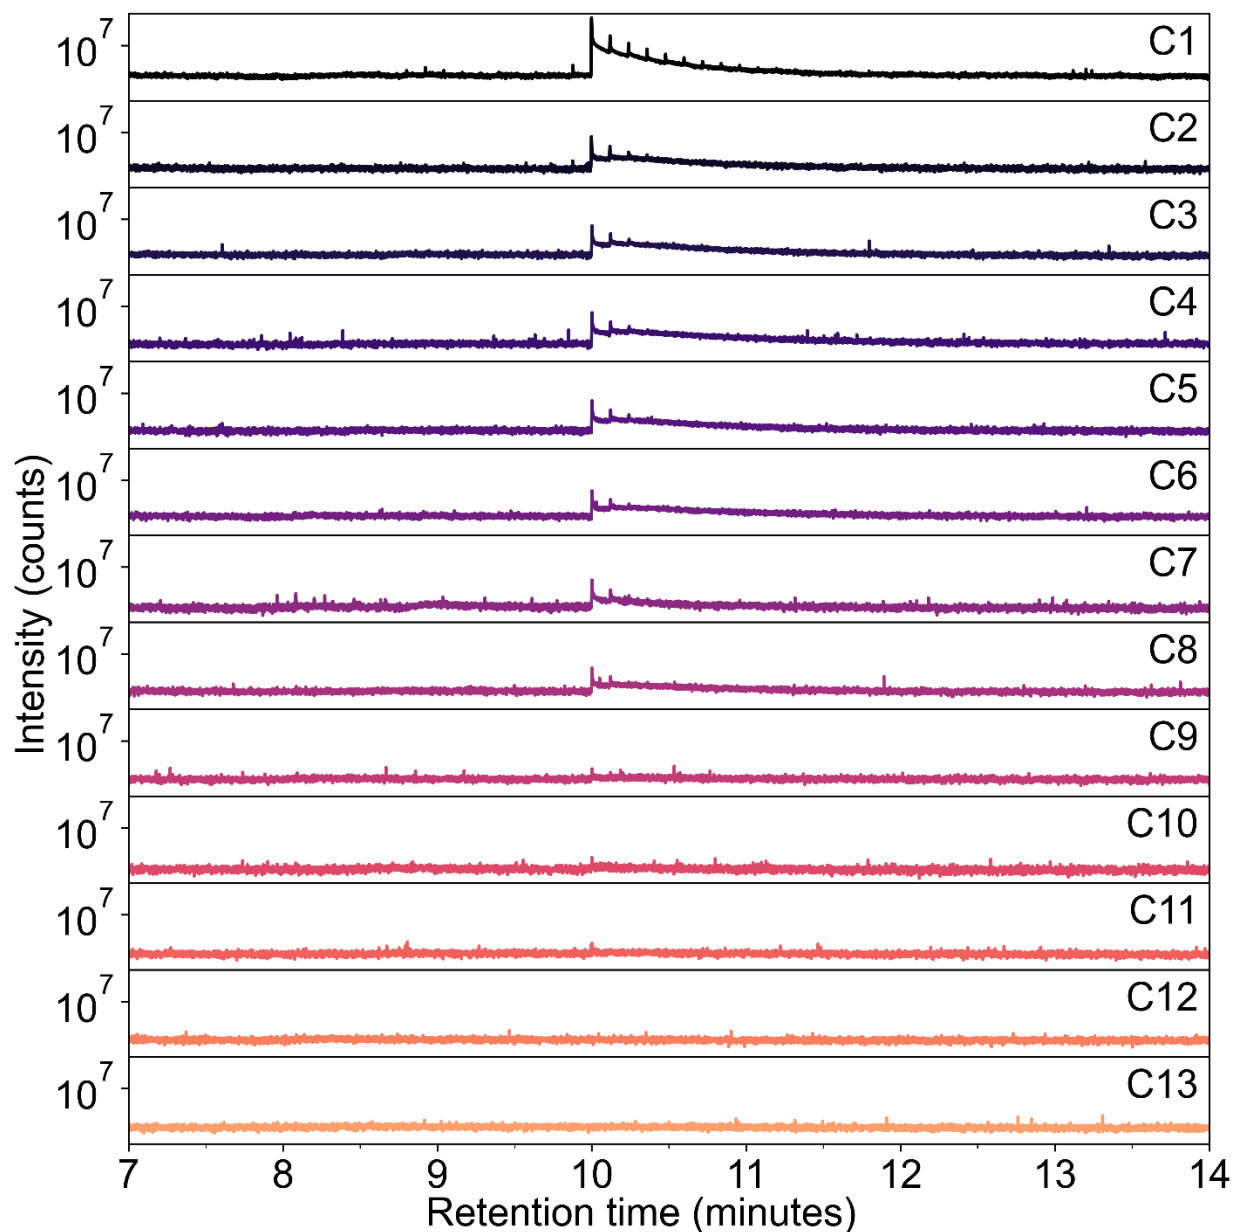

**Figure S18.** 1-Dimensional plots of 2-Dimensional GC  $\times$  GC-SCD chromatograms showing VSC3 peak located at  $t_{R} = 10.082$  min drop in intensity as a function of cultivar number, closely matching the change in olfactory scores.

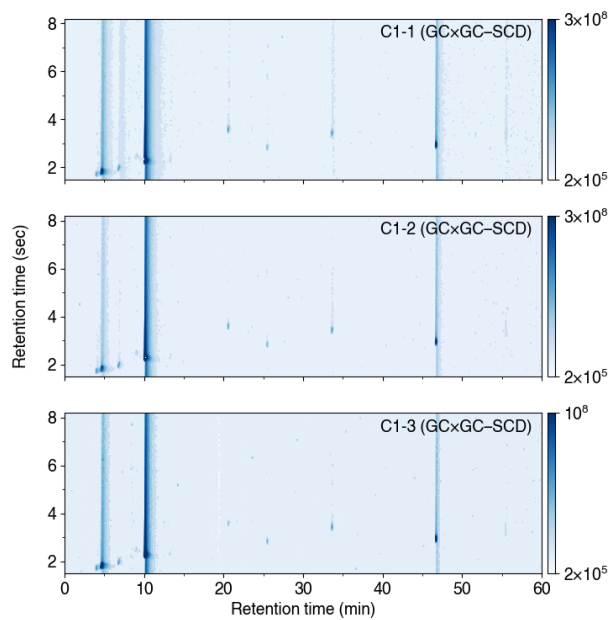

**Figure S19.** Triplicate of GC×GC–SCD 2-Dimensional chromatograms for sample **C1**.

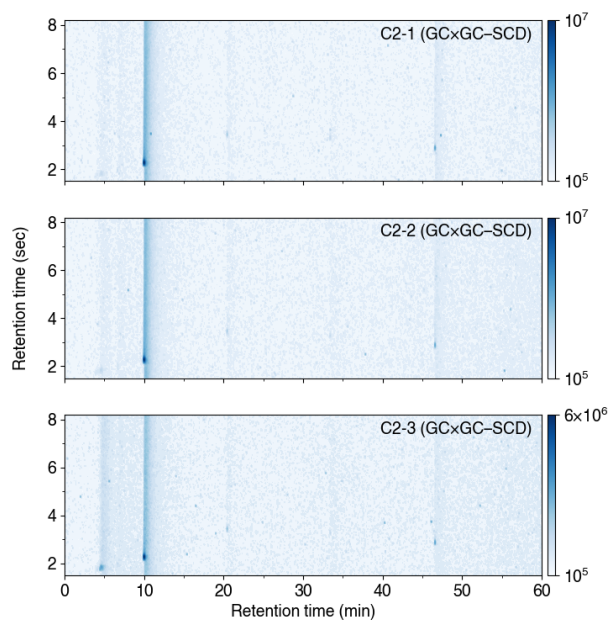

**Figure S20.** Triplicate of GC×GC–SCD 2-Dimensional chromatograms for sample **C2**.

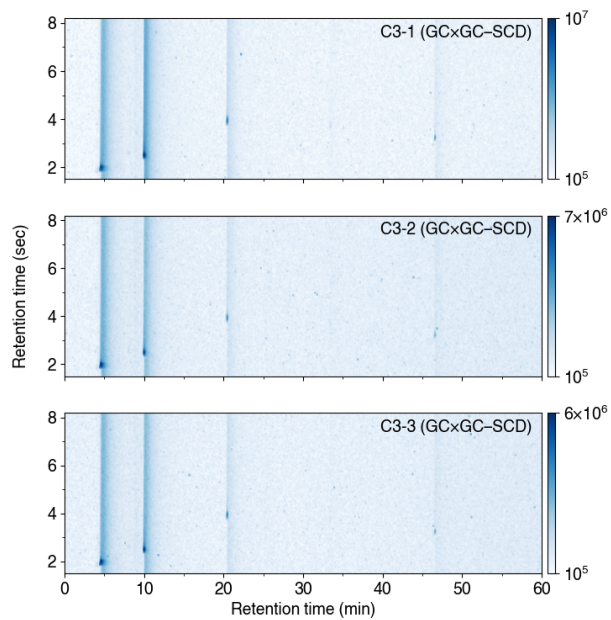

**Figure S21.** Triplicate of GC×GC–SCD 2-Dimensional chromatograms for sample C3.

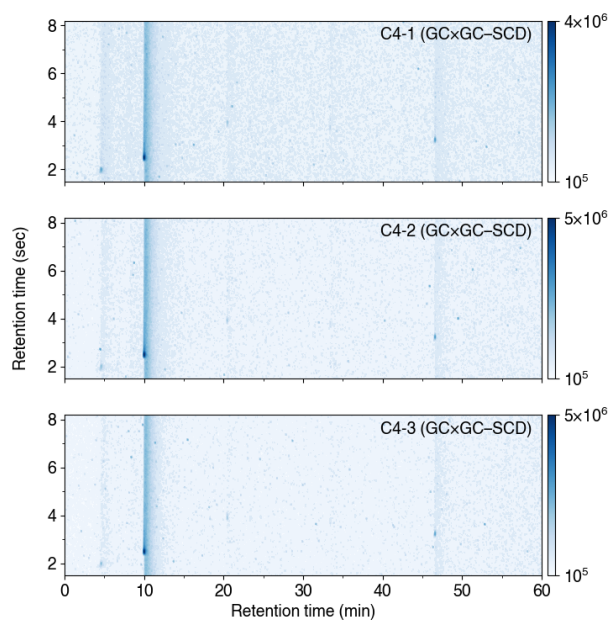

**Figure S22.** Triplicate of GC×GC–SCD 2-Dimensional chromatograms for sample C4.

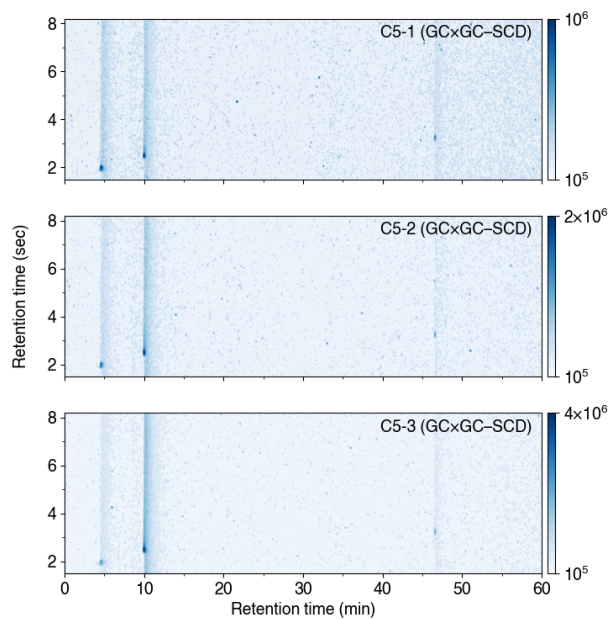

**Figure S23.** Triplicate of GC×GC–SCD 2-Dimensional chromatograms for sample C5.

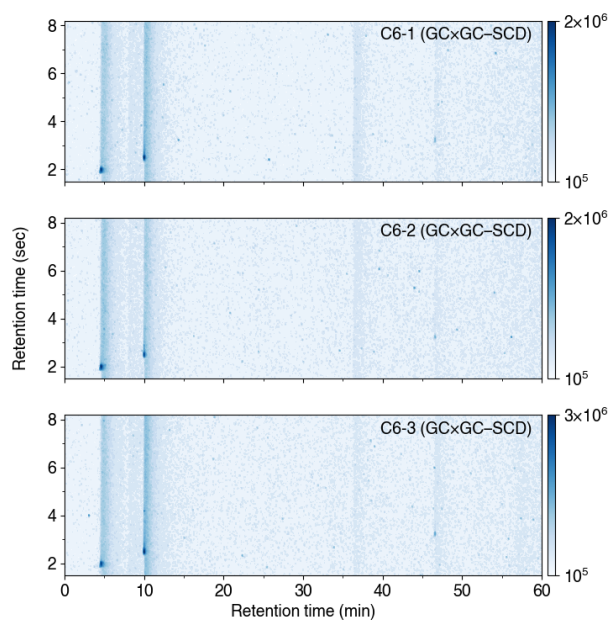

**Figure S24.** Triplicate of GC×GC–SCD 2-Dimensional chromatograms for sample C6.

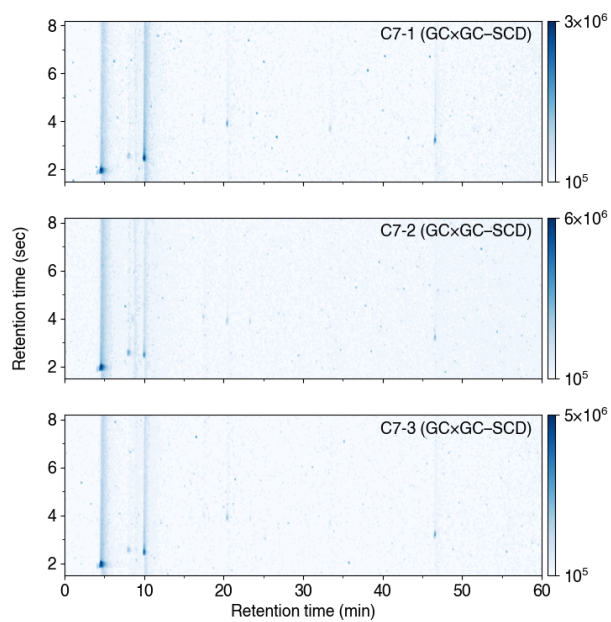

**Figure S25.** Triplicate of GC×GC–SCD 2-Dimensional chromatograms for sample C7.

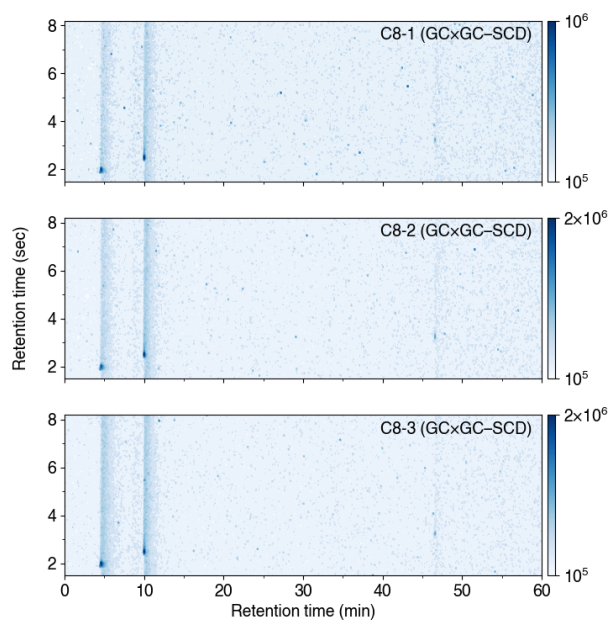

**Figure S26.** Triplicate of GC×GC–SCD 2-Dimensional chromatograms for sample C8.

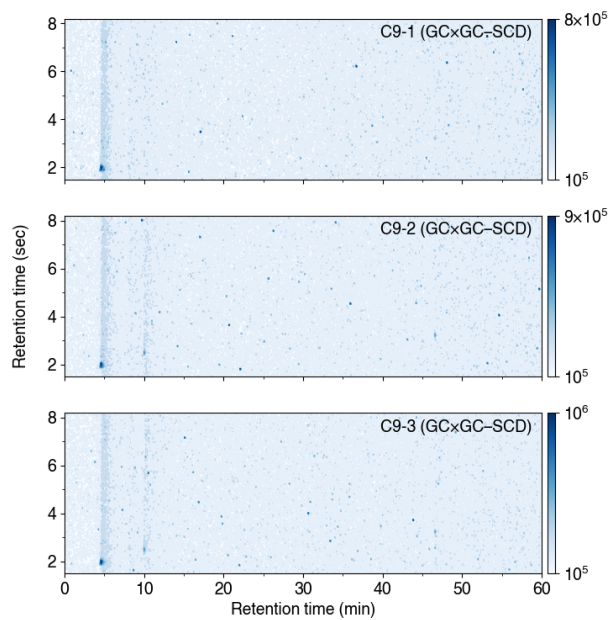

**Figure S27.** Triplicate of GC×GC–SCD 2-Dimensional chromatograms for sample **C9**.

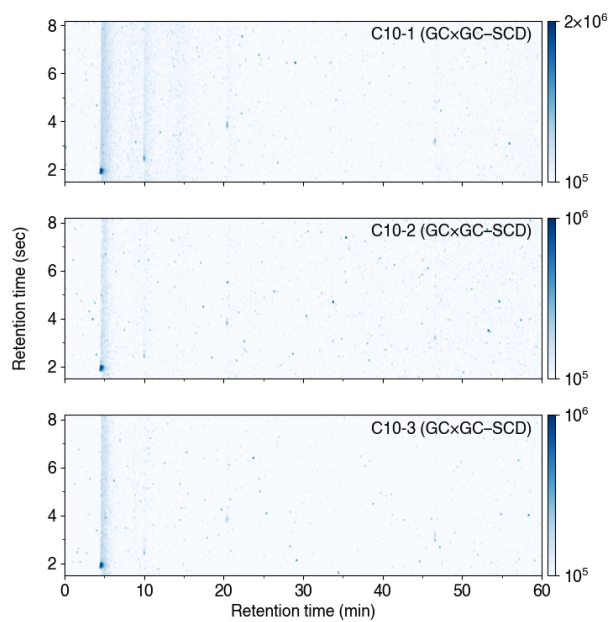

**Figure S28.** Triplicate of GC×GC–SCD 2-Dimensional chromatograms for sample **C10**.



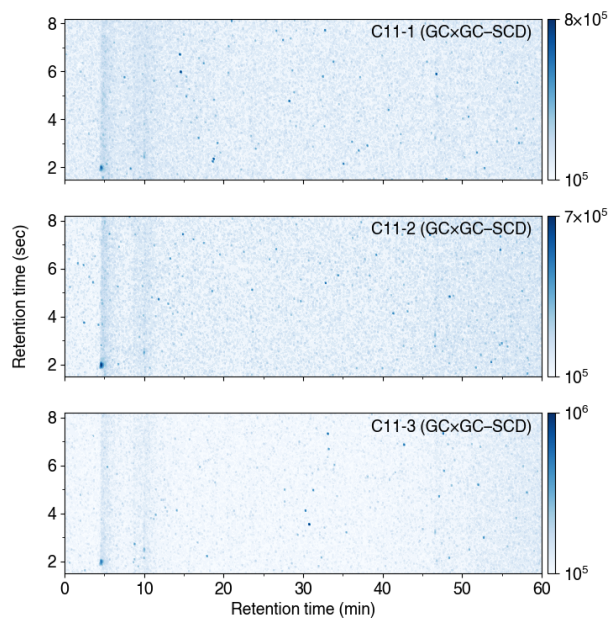

**Figure S29.** Triplicate of GC×GC–SCD 2-Dimensional chromatograms for sample C11.

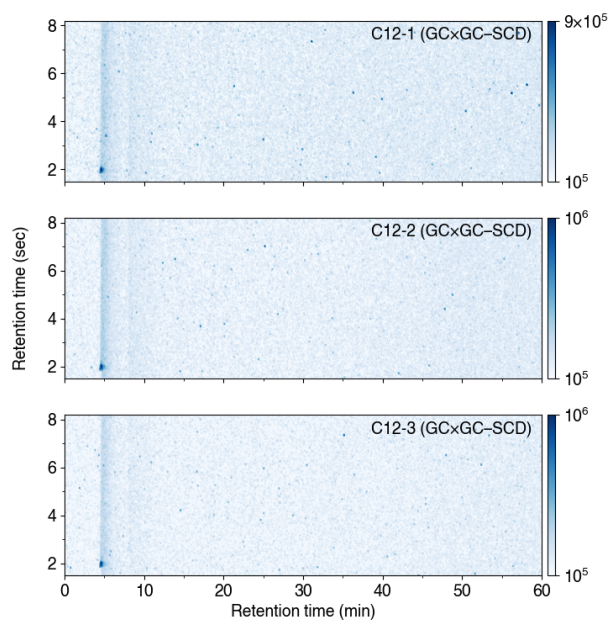

**Figure S30.** Triplicate of GC×GC–SCD 2-Dimensional chromatograms for sample C12.

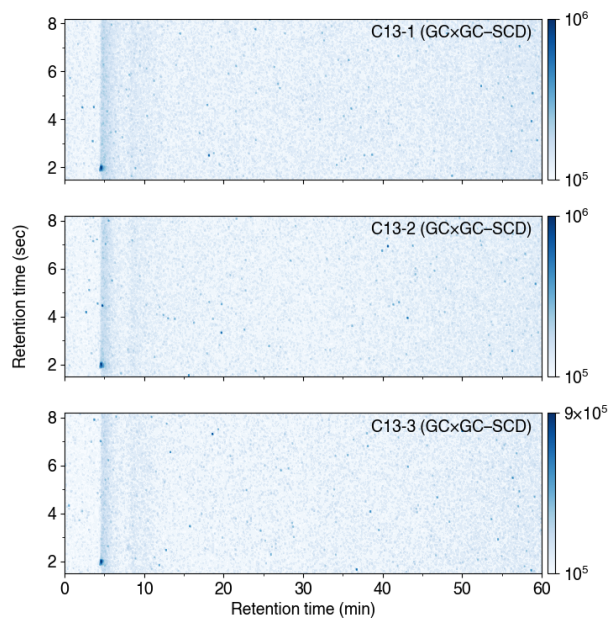

**Figure S31.** Triplicate of GC×GC–SCD 2-Dimensional chromatograms for sample **C13**.

**Table S5.** Highest concentration VOCs identified in cultivar Bacio Gelato (C1).

| Compound name           | RT (min) | Relative-% | Calculated amount ( $\mu\text{g}/\text{mg}$ ) | CAS #      |
|-------------------------|----------|------------|-----------------------------------------------|------------|
| D-Limonene              | 17.68    | 25.771     | 5.61003                                       | 5989-27-5  |
| Caryophyllene           | 42.76    | 9.945      | 2.164922                                      | 87-44-5    |
| $\beta$ -Myrcene        | 15.76    | 7.01       | 1.525976                                      | 123-35-3   |
| Linalool                | 21.37    | 4.465      | 0.971973                                      | 78-70-6    |
| $\beta$ -Pinene         | 15.4     | 4.112      | 0.895155                                      | 127-91-3   |
| $\alpha$ -Terpineol     | 27.85    | 3.894      | 0.847753                                      | 98-55-5    |
| Humulene                | 44.66    | 3.215      | 0.699931                                      | 6753-98-6  |
| $\alpha$ -Pinene        | 13.74    | 2.65       | 0.576887                                      | 80-56-8    |
| endo-Fenchol            | 22.94    | 2.301      | 0.500912                                      | 14575-74-7 |
| $\alpha$ -Bisabolol     | 52.44    | 1.43       | 0.31132                                       | 515-69-5   |
| Caryophyllene oxide     | 49.64    | 1.104      | 0.240257                                      | 1139-30-6  |
| Terpinolene             | 20.62    | 1.099      | 0.239275                                      | 586-62-9   |
| Fenchone                | 21.15    | 0.991      | 0.215771                                      | 1195-79-5  |
| Camphene                | 14.41    | 0.898      | 0.19554                                       | 79-92-5    |
| cis- $\beta$ -Farnesene | 44.24    | 0.885      | 0.192691                                      | 28973-97-9 |
| trans-Sabinene hydrate  | 20.02    | 0.806      | 0.175399                                      | 546-79-2   |
| (-)-Isopulegol          | 24.68    | 0.744      | 0.161906                                      | 232-102-8  |
| $\alpha$ -Terpinene     | 17.16    | 0.651      | 0.14175                                       | 99-86-5    |
| endo-Borneol            | 26.48    | 0.645      | 0.140398                                      | 507-70-0   |
| $\gamma$ -Terpinene     | 19.17    | 0.605      | 0.131641                                      | 99-85-4    |
| $\alpha$ -Phellandrene  | 16.72    | 0.249      | 0.054212                                      | 99-83-2    |
| 3-Carene                | 16.84    | 0.02       | 0.004412                                      | 13466-78-9 |

**Table S6.** Highest concentration VOCs identified in cultivar Clone Guy OG (C2).

| Compound name          | RT (min) | Relative-% | Calculated amount (µg/mg) | CAS #      |
|------------------------|----------|------------|---------------------------|------------|
| D-Limonene             | 17.5575  | 38.321%    | 1.57393                   | 5989-27-5  |
| β-Myrcene              | 15.7281  | 30.334%    | 1.24590                   | 123-35-3   |
| β-Pinene               | 15.3942  | 10.314%    | 0.42362                   | 127-91-3   |
| α-Pinene               | 13.6808  | 9.361%     | 0.38448                   | 80-56-8    |
| Linalool               | 21.3357  | 3.425%     | 0.14067                   | 78-70-6    |
| Camphene               | 14.3813  | 3.097%     | 0.12718                   | 79-92-5    |
| Caryophyllene          | 42.9613  | 1.609%     | 0.06609                   | 87-44-5    |
| endo-Fenchol           | 22.902   | 0.793%     | 0.03258                   | 14575-74-7 |
| Terpinolene            | 20.5929  | 0.506%     | 0.02078                   | 586-62-9   |
| α-Terpineol            | 27.8425  | 0.495%     | 0.02032                   | 98-55-5    |
| Fenchone               | 21.1963  | 0.441%     | 0.01811                   | 1195-79-5  |
| Humulene               | 44.5605  | 0.432%     | 0.01773                   | 6753-98-6  |
| α-Phellandrene         | 16.5972  | 0.215%     | 0.00881                   | 99-83-2    |
| α-Terpinene            | 17.1547  | 0.133%     | 0.00545                   | 99-86-5    |
| cis-β-Farnesene        | 44.0802  | 0.129%     | 0.00530                   | 28973-97-9 |
| γ-Terpinene            | 19.1467  | 0.104%     | 0.00427                   | 99-85-4    |
| 3-Carene               | 16.8375  | 0.041%     | 0.00168                   | 13466-78-9 |
| endo-Borneol           | 26.4575  | 0.037%     | 0.00151                   | 507-70-0   |
| α-Bisabolol            | 52.4622  | 0.027%     | 0.00112                   | 515-69-5   |
| trans-Sabinene hydrate | 19.9609  | 0.025%     | 0.00102                   | 546-79-2   |
| Caryophyllene oxide    | 49.5767  | 0.018%     | 0.00075                   | 1139-30-6  |

**Table S7.** Highest concentration VOCs identified in cultivar Gelato (4 days old) (C3).

| <b>Compound name</b>   | <b>RT (min)</b> | <b>Relative-%</b> | <b>Calculated amount (µg/mg)</b> | <b>CAS #</b> |
|------------------------|-----------------|-------------------|----------------------------------|--------------|
| D-Limonene             | 17.68           | 34.848            | 5.945506                         | 5989-27-5    |
| Linalool               | 21.34           | 9.916             | 1.691778                         | 78-70-6      |
| β-Myrcene              | 15.76           | 9.817             | 1.674884                         | 123-35-3     |
| Caryophyllene          | 42.76           | 9.519             | 1.623994                         | 87-44-5      |
| β-Pinene               | 15.4            | 5.956             | 1.016239                         | 127-91-3     |
| α-Terpineol            | 27.69           | 4.961             | 0.846426                         | 98-55-5      |
| α-Pinene               | 13.74           | 4.873             | 0.831383                         | 80-56-8      |
| endo-Fenchol           | 22.95           | 4.259             | 0.726583                         | 14575-74-7   |
| Humulene               | 44.71           | 3.431             | 0.585419                         | 6753-98-6    |
| cis-β-Farnesene        | 44.24           | 2.056             | 0.350849                         | 28973-97-9   |
| Camphene               | 14.41           | 1.503             | 0.256444                         | 79-92-5      |
| Fenchone               | 21.2            | 1.073             | 0.18308                          | 1195-79-5    |
| Terpinolene            | 20.63           | 0.931             | 0.158791                         | 586-62-9     |
| Caryophyllene oxide    | 49.64           | 0.811             | 0.138387                         | 1139-30-6    |
| endo-Borneol           | 26.45           | 0.69              | 0.117674                         | 507-70-0     |
| trans-Nerolidol        | 48.47           | 0.605             | 0.103145                         | 40716-66-3   |
| α-Bisabolol            | 52.52           | 0.551             | 0.093927                         | 515-69-5     |
| trans-Sabinene hydrate | 19.99           | 0.522             | 0.089034                         | 546-79-2     |
| α-Terpinene            | 17.18           | 0.516             | 0.088042                         | 99-86-5      |
| γ-Terpinene            | 19.15           | 0.465             | 0.079253                         | 99-85-4      |
| α-Phellandrene         | 16.72           | 0.19              | 0.032431                         | 99-83-2      |
| 3-Carene               | 16.84           | 0.02              | 0.003328                         | 13466-78-9   |

**Table S8.** Highest concentration VOCs identified in cultivar Area 41 (C4).

| <b>Compound name</b>   | <b>RT (min)</b> | <b>Relative-%</b> | <b>Calculated amount (µg/mg)</b> | <b>CAS #</b> |
|------------------------|-----------------|-------------------|----------------------------------|--------------|
| β-Myrcene              | 15.76           | 26.279            | 7.526606                         | 123-35-3     |
| D-Limonene             | 17.68           | 24.772            | 7.094881                         | 5989-27-5    |
| Caryophyllene          | 42.76           | 13.081            | 3.746509                         | 87-44-5      |
| Linalool               | 21.35           | 7.231             | 2.071128                         | 78-70-6      |
| β-Pinene               | 15.4            | 5.064             | 1.450266                         | 127-91-3     |
| α-Terpineol            | 27.85           | 3.449             | 0.987877                         | 98-55-5      |
| Humulene               | 44.71           | 3.233             | 0.925917                         | 6753-98-6    |
| endo-Fenchol           | 22.95           | 3.045             | 0.872065                         | 14575-74-7   |
| α-Pinene               | 13.75           | 2.894             | 0.828783                         | 80-56-8      |
| Camphene               | 14.41           | 0.972             | 0.2785                           | 79-92-5      |
| Fenchone               | 21.2            | 0.692             | 0.198056                         | 1195-79-5    |
| Terpinolene            | 20.64           | 0.671             | 0.192181                         | 586-62-9     |
| α-Bisabolol            | 52.47           | 0.483             | 0.13836                          | 515-69-5     |
| endo-Borneol           | 26.45           | 0.462             | 0.132228                         | 507-70-0     |
| Caryophyllene oxide    | 49.58           | 0.451             | 0.129105                         | 1139-30-6    |
| trans-Sabinene hydrate | 20.02           | 0.349             | 0.099959                         | 546-79-2     |
| α-Terpinene            | 17.18           | 0.324             | 0.092733                         | 99-86-5      |
| γ-Terpinene            | 19.18           | 0.286             | 0.081822                         | 99-85-4      |
| Sabinene               | 15.28           | 0.245             | 0.070123                         | 3387-41-5    |
| cis-β-Farnesene        | 44.25           | 0.24              | 0.068733                         | 28973-97-9   |
| α-Phellandrene         | 16.72           | 0.133             | 0.038063                         | 99-83-2      |
| 3-Carene               | 16.84           | 0.058             | 0.016744                         | 13466-78-9   |

**Table S9.** Highest concentration VOCs identified in cultivar Jetlag OG (C5).

| <b>Compound name</b>    | <b>RT (min)</b> | <b>Relative-%</b> | <b>Calculated amount (µg/mg)</b> | <b>CAS #</b> |
|-------------------------|-----------------|-------------------|----------------------------------|--------------|
| D-Limonene              | 17.68           | 25.938            | 4.840071                         | 5989-27-5    |
| Linalool                | 21.34           | 14.848            | 2.770769                         | 78-70-6      |
| Caryophyllene           | 42.76           | 12.984            | 2.422941                         | 87-44-5      |
| $\alpha$ -Terpineol     | 27.85           | 5.153             | 0.961588                         | 98-55-5      |
| endo-Fenchol            | 22.95           | 4.914             | 0.916925                         | 14575-74-7   |
| $\alpha$ -Pinene        | 13.75           | 4.821             | 0.899695                         | 80-56-8      |
| $\beta$ -Pinene         | 15.4            | 4.364             | 0.814424                         | 127-91-3     |
| Humulene                | 44.71           | 3.576             | 0.667236                         | 6753-98-6    |
| $\beta$ -Myrcene        | 15.76           | 3.059             | 0.570735                         | 123-35-3     |
| cis- $\beta$ -Farnesene | 44.26           | 2.194             | 0.409429                         | 28973-97-9   |
| Camphene                | 14.41           | 1.252             | 0.233701                         | 79-92-5      |
| Terpinolene             | 20.64           | 0.849             | 0.158463                         | 586-62-9     |
| trans-Nerolidol         | 48.51           | 0.819             | 0.152883                         | 40716-66-3   |
| Caryophyllene oxide     | 49.59           | 0.77              | 0.143775                         | 1139-30-6    |
| endo-Borneol            | 26.44           | 0.66              | 0.123237                         | 507-70-0     |
| trans-Sabinene hydrate  | 20.02           | 0.52              | 0.096952                         | 546-79-2     |
| Fenchone                | 21.15           | 0.516             | 0.09637                          | 1195-79-5    |
| $\alpha$ -Bisabolol     | 52.53           | 0.492             | 0.091772                         | 515-69-5     |
| $\alpha$ -Terpinene     | 17.18           | 0.491             | 0.091567                         | 99-86-5      |
| $\gamma$ -Terpinene     | 19.15           | 0.438             | 0.081754                         | 99-85-4      |
| $\alpha$ -Phellandrene  | 16.72           | 0.166             | 0.030916                         | 99-83-2      |
| 3-Carene                | 16.84           | 0.011             | 0.002047                         | 13466-78-9   |

**Table S10.** Highest concentration VOCs identified in cultivar Gushers (C6).

| <b>Compound name</b>    | <b>RT (min)</b> | <b>Relative-%</b> | <b>Calculated amount (<math>\mu\text{g}/\text{mg}</math>)</b> | <b>CAS #</b> |
|-------------------------|-----------------|-------------------|---------------------------------------------------------------|--------------|
| D-Limonene              | 17.56           | 25.672            | 3.799173                                                      | 5989-27-5    |
| Caryophyllene           | 42.76           | 15.815            | 2.34043                                                       | 87-44-5      |
| Linalool                | 21.34           | 7.761             | 1.148611                                                      | 78-70-6      |
| $\beta$ -Myrcene        | 15.76           | 6.593             | 0.975758                                                      | 123-35-3     |
| $\alpha$ -Terpineol     | 27.85           | 4.961             | 0.734154                                                      | 98-55-5      |
| $\beta$ -Pinene         | 15.4            | 4.416             | 0.653584                                                      | 127-91-3     |
| endo-Fenchol            | 22.95           | 4.101             | 0.60697                                                       | 14575-74-7   |
| Humulene                | 44.71           | 4.074             | 0.602883                                                      | 6753-98-6    |
| $\alpha$ -Pinene        | 13.74           | 3.589             | 0.531117                                                      | 80-56-8      |
| Camphene                | 14.41           | 1.583             | 0.234227                                                      | 79-92-5      |
| Terpinolene             | 20.64           | 1.304             | 0.192962                                                      | 586-62-9     |
| Fenchone                | 21.18           | 1.004             | 0.148556                                                      | 1195-79-5    |
| Caryophyllene oxide     | 49.59           | 0.813             | 0.120347                                                      | 1139-30-6    |
| cis- $\beta$ -Farnesene | 44.24           | 0.768             | 0.113697                                                      | 28973-97-9   |
| $\alpha$ -Terpinene     | 17.23           | 0.724             | 0.107091                                                      | 99-86-5      |
| $\alpha$ -Bisabolol     | 52.52           | 0.667             | 0.098774                                                      | 515-69-5     |
| (-)-Isopulegol          | 24.71           | 0.597             | 0.088406                                                      | 232-102-8    |
| endo-Borneol            | 26.48           | 0.584             | 0.086367                                                      | 507-70-0     |
| $\gamma$ -Terpinene     | 19.18           | 0.516             | 0.076292                                                      | 99-85-4      |
| $\alpha$ -Phellandrene  | 16.72           | 0.232             | 0.034364                                                      | 99-83-2      |



**Table S11.** Highest concentration VOCs identified in cultivar WiFi Cake (C7).

| <b>Compound name</b> | <b>RT (min)</b> | <b>Relative-%</b> | <b>Calculated amount (µg/mg)</b> | <b>CAS #</b> |
|----------------------|-----------------|-------------------|----------------------------------|--------------|
| D-Limonene           | 17.68           | 35.648            | 5.58046                          | 5989-27-5    |
| β-Myrcene            | 15.76           | 17.643            | 2.761949                         | 123-35-3     |
| Linalool             | 21.34           | 9.61              | 1.504312                         | 78-70-6      |
| Caryophyllene        | 42.76           | 6.655             | 1.041734                         | 87-44-5      |
| β-Pinene             | 15.4            | 6.648             | 1.040715                         | 127-91-3     |
| α-Pinene             | 13.74           | 4.257             | 0.666448                         | 80-56-8      |
| α-Terpineol          | 27.86           | 3.097             | 0.484825                         | 98-55-5      |
| endo-Fenchol         | 22.95           | 2.923             | 0.457649                         | 14575-74-7   |
| Humulene             | 44.71           | 1.975             | 0.309148                         | 6753-98-6    |
| Camphene             | 14.41           | 1.549             | 0.242438                         | 79-92-5      |
| cis-β-Farnesene      | 44.24           | 1.446             | 0.2264                           | 28973-97-9   |
| Terpinolene          | 20.64           | 0.871             | 0.136381                         | 586-62-9     |
| Caryophyllene oxide  | 49.64           | 0.824             | 0.128921                         | 1139-30-6    |
| trans-Nerolidol      | 48.56           | 0.797             | 0.124795                         | 40716-66-3   |
| endo-Borneol         | 26.45           | 0.644             | 0.100813                         | 507-70-0     |
| Fenchone             | 21.21           | 0.594             | 0.092952                         | 1195-79-5    |
| α-Terpinene          | 17.17           | 0.585             | 0.091522                         | 99-86-5      |
| γ-Terpinene          | 19.17           | 0.494             | 0.077338                         | 99-85-4      |
| Sabinene             | 15.28           | 0.462             | 0.072334                         | 3387-41-5    |
| α-Phellandrene       | 16.72           | 0.211             | 0.033055                         | 99-83-2      |
| 3-Carene             | 16.84           | 0.041             | 0.006401                         | 13466-78-9   |

**Table S12.** Highest concentration VOCs identified in cultivar Apple Fritter (C8).

| <b>Compound name</b>   | <b>RT (min)</b> | <b>Relative-%</b> | <b>Calculated amount (µg/mg)</b> | <b>CAS #</b> |
|------------------------|-----------------|-------------------|----------------------------------|--------------|
| Caryophyllene          | 42.76           | 33.549            | 5.172868                         | 87-44-5      |
| D-Limonene             | 17.68           | 21.796            | 3.36059                          | 5989-27-5    |
| Humulene               | 44.71           | 7.49              | 1.154909                         | 6753-98-6    |
| Linalool               | 21.38           | 5.567             | 0.858309                         | 78-70-6      |
| α-Pinene               | 13.74           | 5.44              | 0.83876                          | 80-56-8      |
| β-Pinene               | 15.4            | 4.057             | 0.625533                         | 127-91-3     |
| α-Terpineol            | 27.85           | 3.221             | 0.49659                          | 98-55-5      |
| endo-Fenchol           | 22.95           | 2.816             | 0.434163                         | 14575-74-7   |
| β-Myrcene              | 15.76           | 2.699             | 0.416114                         | 123-35-3     |
| cis-β-Farnesene        | 44.24           | 2.384             | 0.367521                         | 28973-97-9   |
| Caryophyllene oxide    | 49.64           | 1.181             | 0.182021                         | 1139-30-6    |
| α-Bisabolol            | 52.46           | 1.071             | 0.165104                         | 515-69-5     |
| Camphene               | 14.41           | 0.985             | 0.151811                         | 79-92-5      |
| trans-Nerolidol        | 48.51           | 0.812             | 0.125227                         | 40716-66-3   |
| Terpinolene            | 20.64           | 0.809             | 0.124726                         | 586-62-9     |
| Fenchone               | 21.21           | 0.759             | 0.116986                         | 1195-79-5    |
| endo-Borneol           | 26.46           | 0.653             | 0.100694                         | 507-70-0     |
| trans-Sabinene hydrate | 19.96           | 0.586             | 0.090316                         | 546-79-2     |
| α-Terpinene            | 17.18           | 0.516             | 0.079579                         | 99-86-5      |
| γ-Terpinene            | 19.16           | 0.507             | 0.078208                         | 99-85-4      |
| α-Phellandrene         | 16.72           | 0.187             | 0.028841                         | 99-83-2      |

**Table S13.** Highest concentration VOCs identified in cultivar Chem 91 (C9).

| <b>Compound name</b>   | <b>RT (min)</b> | <b>Relative-%</b> | <b>Calculated amount (µg/mg)</b> | <b>CAS #</b> |
|------------------------|-----------------|-------------------|----------------------------------|--------------|
| β-Myrcene              | 15.76           | 19.476            | 2.751967863                      | 123-35-3     |
| Caryophyllene          | 42.76           | 18.177            | 2.568458669                      | 87-44-5      |
| D-Limonene             | 17.68           | 11.423            | 1.61407907                       | 5989-27-5    |
| Humulene               | 44.71           | 5.673             | 0.801625339                      | 6753-98-6    |
| β-Pinene               | 15.4            | 5.087             | 0.718858184                      | 127-91-3     |
| Linalool               | 21.38           | 4.293             | 0.606552937                      | 78-70-6      |
| endo-Fenchol           | 22.95           | 4.154             | 0.586954043                      | 14575-74-7   |
| α-Pinene               | 13.74           | 3.062             | 0.432730689                      | 80-56-8      |
| α-Terpineol            | 27.86           | 2.894             | 0.408880382                      | 98-55-5      |
| α-Bisabolol            | 52.46           | 2.007             | 0.283581572                      | 515-69-5     |
| Caryophyllene oxide    | 49.64           | 1.579             | 0.223146286                      | 1139-30-6    |
| Fenchone               | 21.2            | 1.356             | 0.191606487                      | 1195-79-5    |
| endo-Borneol           | 26.45           | 1.269             | 0.179269785                      | 507-70-0     |
| Terpinolene            | 20.64           | 1.25              | 0.176676161                      | 586-62-9     |
| Camphene               | 14.41           | 1.059             | 0.149628579                      | 79-92-5      |
| trans-Sabinene hydrate | 20.1            | 1.052             | 0.14867136                       | 546-79-2     |
| α-Terpinene            | 17.22           | 0.956             | 0.13511981                       | 99-86-5      |
| γ-Terpinene            | 19.16           | 0.851             | 0.120242656                      | 99-85-4      |
| α-Phellandrene         | 16.72           | 0.354             | 0.049984536                      | 99-83-2      |
| cis-β-Farnesene        | 44.26           | 0.341             | 0.048183245                      | 28973-97-9   |

**Table S14.** Highest concentration VOCs identified in cultivar Gelato (46 days old) (C10).

| Compound name   | RT (min) | Relative-% | Calculated amount (µg/mg) | CAS #      |
|-----------------|----------|------------|---------------------------|------------|
| D-Limonene      | 17.56    | 26.73      | 1.665898                  | 5989-27-5  |
| Linalool        | 21.36    | 12.101     | 0.754195                  | 78-70-6    |
| Caryophyllene   | 42.76    | 10.066     | 0.627324                  | 87-44-5    |
| α-Terpineol     | 27.85    | 6.889      | 0.429328                  | 98-55-5    |
| endo-Fenchol    | 22.94    | 6.511      | 0.405764                  | 14575-74-7 |
| β-Pinene        | 15.4     | 5.838      | 0.36382                   | 127-91-3   |
| α-Pinene        | 13.74    | 4.888      | 0.304643                  | 80-56-8    |
| Humulene        | 44.66    | 4.796      | 0.298909                  | 6753-98-6  |
| β-Myrcene       | 15.76    | 4.693      | 0.292464                  | 123-35-3   |
| Terpinolene     | 20.63    | 2.782      | 0.173361                  | 586-62-9   |
| cis-β-Farnesene | 44.23    | 2.227      | 0.138781                  | 28973-97-9 |
| Camphene        | 14.41    | 2.001      | 0.124734                  | 79-92-5    |
| Fenchone        | 21.2     | 1.623      | 0.101128                  | 1195-79-5  |
| α-Terpinene     | 17.17    | 1.497      | 0.093316                  | 99-86-5    |
| endo-Borneol    | 26.46    | 1.404      | 0.087481                  | 507-70-0   |
| γ-Terpinene     | 19.17    | 1.207      | 0.075244                  | 99-85-4    |
| α-Phellandrene  | 16.72    | 0.486      | 0.030283                  | 99-83-2    |
| 3-Carene        | 16.84    | 0.173      | 0.010759                  | 13466-78-9 |

**Table S15.** Highest concentration VOCs identified in cultivar Caliberry (C11).

| <b>Compound name</b> | <b>RT (min)</b> | <b>Relative-%</b> | <b>Calculated amount (µg/mg)</b> | <b>CAS #</b> |
|----------------------|-----------------|-------------------|----------------------------------|--------------|
| β-Myrcene            | 15.76           | 53.906            | 8.308325                         | 123-35-3     |
| α-Pinene             | 13.75           | 9.118             | 1.405261                         | 80-56-8      |
| Linalool             | 21.38           | 6.234             | 0.960748                         | 78-70-6      |
| D-Limonene           | 17.68           | 6.093             | 0.939039                         | 5989-27-5    |
| β-Pinene             | 15.4            | 5.286             | 0.814685                         | 127-91-3     |
| Caryophyllene        | 42.76           | 4.726             | 0.728443                         | 87-44-5      |
| Humulene             | 44.71           | 1.732             | 0.266898                         | 6753-98-6    |
| α-Terpineol          | 27.86           | 1.175             | 0.181157                         | 98-55-5      |
| trans-Nerolidol      | 48.51           | 1.033             | 0.159233                         | 40716-66-3   |
| α-Bisabolol          | 52.46           | 0.931             | 0.143551                         | 515-69-5     |
| Caryophyllene oxide  | 49.64           | 0.881             | 0.135753                         | 1139-30-6    |
| endo-Fenchol         | 22.97           | 0.798             | 0.123016                         | 14575-74-7   |
| Terpinolene          | 20.65           | 0.664             | 0.102323                         | 586-62-9     |
| Camphene             | 14.41           | 0.596             | 0.091811                         | 79-92-5      |
| γ-Terpinene          | 19.08           | 0.555             | 0.085577                         | 99-85-4      |
| Fenchone             | 21.21           | 0.546             | 0.084095                         | 1195-79-5    |
| endo-Borneol         | 26.38           | 0.532             | 0.082004                         | 507-70-0     |
| α-Terpinene          | 17.24           | 0.505             | 0.077793                         | 99-86-5      |
| Sabinene             | 15.33           | 0.482             | 0.074319                         | 3387-41-5    |
| cis-β-Farnesene      | 44.25           | 0.282             | 0.043422                         | 28973-97-9   |
| α-Phellandrene       | 16.72           | 0.225             | 0.034732                         | 99-83-2      |
| 3-Carene             | 16.84           | 0.082             | 0.012613                         | 13466-78-9   |

**Table S16.** Highest concentration VOCs identified in cultivar Gouda Berry (C12).

| Compound name       | RT (min) | Relative-% | Calculated amount (µg/mg) | CAS #      |
|---------------------|----------|------------|---------------------------|------------|
| Caryophyllene       | 42.76    | 18.097     | 2.719838                  | 87-44-5    |
| β-Myrcene           | 15.76    | 16.917     | 2.542454                  | 123-35-3   |
| D-Limonene          | 17.68    | 14.813     | 2.226217                  | 5989-27-5  |
| Linalool            | 21.35    | 6.584      | 0.989467                  | 78-70-6    |
| Humulene            | 44.71    | 4.411      | 0.662926                  | 6753-98-6  |
| β-Pinene            | 15.4     | 3.961      | 0.59525                   | 127-91-3   |
| α-Terpineol         | 27.85    | 2.814      | 0.422983                  | 98-55-5    |
| endo-Fenchol        | 22.95    | 2.575      | 0.386982                  | 14575-74-7 |
| α-Pinene            | 13.74    | 2.265      | 0.340432                  | 80-56-8    |
| cis-β-Farnesene     | 44.3     | 1.06       | 0.159356                  | 28973-97-9 |
| α-Bisabolol         | 52.46    | 0.906      | 0.136179                  | 515-69-5   |
| Caryophyllene oxide | 49.64    | 0.895      | 0.134566                  | 1139-30-6  |
| Camphene            | 14.41    | 0.862      | 0.129512                  | 79-92-5    |
| Terpinolene         | 20.64    | 0.786      | 0.118152                  | 586-62-9   |
| endo-Borneol        | 26.45    | 0.719      | 0.107992                  | 507-70-0   |
| trans-Nerolidol     | 48.56    | 0.685      | 0.102986                  | 40716-66-3 |
| α-Terpinene         | 17.16    | 0.52       | 0.078164                  | 99-86-5    |
| Fenchone            | 21.2     | 0.512      | 0.076945                  | 1195-79-5  |
| γ-Terpinene         | 19.18    | 0.487      | 0.073204                  | 99-85-4    |
| Sabinene            | 15.16    | 0.475      | 0.071392                  | 3387-41-5  |
| α-Phellandrene      | 16.72    | 0.198      | 0.029806                  | 99-83-2    |

**Table S17.** Highest concentration VOCs identified in cultivar Black Jack (C13).

| <b>Compound name</b>   | <b>RT (min)</b> | <b>Relative-%</b> | <b>Calculated amount (µg/mg)</b> | <b>CAS #</b> |
|------------------------|-----------------|-------------------|----------------------------------|--------------|
| Terpinolene            | 20.62           | 26.152            | 2.318045                         | 586-62-9     |
| Caryophyllene          | 42.76           | 22.125            | 1.961073                         | 87-44-5      |
| β-Myrcene              | 15.76           | 7.355             | 0.651928                         | 123-35-3     |
| Humulene               | 44.71           | 7.213             | 0.639356                         | 6753-98-6    |
| β-Pinene               | 15.4            | 5.856             | 0.519053                         | 127-91-3     |
| α-Pinene               | 13.75           | 4.979             | 0.441357                         | 80-56-8      |
| D-Limonene             | 17.56           | 2.834             | 0.251219                         | 5989-27-5    |
| α-Terpineol            | 27.86           | 2.622             | 0.232374                         | 98-55-5      |
| cis-β-Farnesene        | 44.24           | 2.507             | 0.222197                         | 28973-97-9   |
| 3-Carene               | 16.84           | 2.482             | 0.219965                         | 13466-78-9   |
| Linalool               | 21.39           | 2.154             | 0.190912                         | 78-70-6      |
| α-Phellandrene         | 16.72           | 1.983             | 0.175747                         | 99-83-2      |
| α-Terpinene            | 17.16           | 1.823             | 0.161626                         | 99-86-5      |
| Caryophyllene oxide    | 49.64           | 1.701             | 0.150752                         | 1139-30-6    |
| γ-Terpinene            | 19.14           | 1.513             | 0.134151                         | 99-85-4      |
| trans-Sabinene hydrate | 20.02           | 1.279             | 0.113336                         | 546-79-2     |
| trans-Nerolidol        | 48.56           | 1.052             | 0.093243                         | 40716-66-3   |
| Sabinene               | 15.16           | 0.916             | 0.081167                         | 3387-41-5    |
| endo-Borneol           | 26.43           | 0.832             | 0.073781                         | 507-70-0     |
| endo-Fenchol           | 22.97           | 0.806             | 0.07145                          | 14575-74-7   |
| Camphene               | 14.41           | 0.559             | 0.049536                         | 79-92-5      |

**Table S18.** Details of Clone Guy OG indoor greenhouse trial.

| <b>Week</b> | <b>Organ measured</b>    | <b>Stage of growth</b> |
|-------------|--------------------------|------------------------|
| 1           | N/A                      | Flowering              |
| 2           | Flower (4 samples)       | Flowering              |
| 3           | Flower (4 samples)       | Flowering              |
| 4           | Flower (4 samples)       | Flowering              |
| 5           | Flower (4 samples)       | Flowering              |
| 6           | Flower (4 samples)       | Flowering              |
| 7           | Flower (4 samples)       | Flowering              |
| 8           | Flower (4 samples)       | Flowering              |
| 9           | Flower (4 samples)       | Flowering              |
| 10          | Flower (4 samples)       | End of flowering       |
| 11          | Cured Flower (4 samples) | End of curing & drying |
| 12          | Cured Flower(4 samples)  | 10 days post cure      |
